# Supplementary material for: Association of Clinical Aspects and Genetic Variants with the Severity of Cisplatin-Induced Ototoxicity in Head and Neck Squamous Cell Carcinoma: A Prospective Cohort Study
Source: MDPI journal article supplement (doi:10.3390/cancers15061759), 2023-03-14
Supplement: s1 [file s1]

**Table S2.** Single nucleotide variants encoding cisplatin metabolism and pure tone high frequency threshold averages in air conduction (3, 4, 6 and 8 KHz).

| Variable              | N  | Right ear                    |                               |                  |             |           | Left ear                     |                               |                  |             |           |
|-----------------------|----|------------------------------|-------------------------------|------------------|-------------|-----------|------------------------------|-------------------------------|------------------|-------------|-----------|
|                       |    | Pretreatment<br>Median (IQR) | Posttreatment<br>Median (IQR) | Difference       | p-<br>value | PA<br>(%) | Pretreatment<br>Median (IQR) | Posttreatment<br>Median (IQR) | Difference       | p-<br>value | PA<br>(%) |
| <i>GSTM1</i>          |    |                              |                               |                  |             |           |                              |                               |                  |             |           |
| Present               | 40 | 26.9 (17.5-48.4)             | 53.1 (29.1-68.8)              | 11.3 (3.1-30.9)  | 0.20        | NA        | 23.8 (16.3-47.2)             | 53.1 (31.6-62.5)              | 15.0 (5.0-29.7)  | 0.10        | NA        |
| Null                  | 49 | 37.5 (19.4-50.0)             | 61.3 (45.6-68.1)              | 20.0 (11.3-27.5) |             |           | 35.0 (23.1-47.5)             | 60.0 (46.3-68.8)              | 22.5 (11.3-34.4) |             |           |
| <i>GSTT1</i>          |    |                              |                               |                  |             |           |                              |                               |                  |             |           |
| Present               | 75 | 32.5 (17.5-50.0)             | 61.3 (43.8-68.8)              | 21.3 (7.5-31.3)  | 0.07        | NA        | 30.0 (20.0-47.5)             | 57.5 (43.8-68.8)              | 20.0 (8.8-35.0)  | 0.04        | 59.4      |
| Null                  | 14 | 28.8 (20.-44.1)              | 31.3 (26.3-58.4)              | 10.0 (0.9-20.3)  |             |           | 35.0 (19.7-46.3)             | 43.1 (32.2-58.4)              | 11.3 (0.6-22.8)  |             |           |
| <i>GSTP1</i> c.313A>G |    |                              |                               |                  |             |           |                              |                               |                  |             |           |
| AA                    | 40 | 31.3 (18.1-50.0)             | 55.6 (30.6-67.5)              | 16.3 (5.6-24.7)  | 0.43        | NA        | 31.9 (19.1-47.2)             | 52.5 (39.1-64.1)              | 17.5 (7.8-25.6)  | 0.18        | NA        |
| AG or GG              | 49 | 27.5 (18.1-50.0)             | 61.3 (42.5-68.8)              | 20.0 (6.3-34.4)  |             |           | 28.8 (20.0-47.5)             | 58.8 (45.6-69.4)              | 20.0 (6.3-41.9)  |             |           |
| AA or AG              | 84 | 33.1 (17.8-50.0)             | 59.4 (38.8-68.8)              | 17.5 (5.6-26.3)  | 0.81        | NA        | 33.1 (20.0-47.5)             | 55.0 (42.5-67.2)              | 18.8 (6.6-29.7)  | 0.37        | NA        |
| GG                    | 5  | 21.3 (15.0-26.3)             | 45.0 (25.0-71.3)              | 30.0 (1.3-50.6)  |             |           | 16.3 (7.5-26.3)              | 40.0 (21.3-82.5)              | 30.0 (5.0-61.9)  |             |           |
| <i>XPC</i> c.2815A>C  |    |                              |                               |                  |             |           |                              |                               |                  |             |           |
| AA                    | 34 | 26.3 (16.9-42.2)             | 60.0 (43.4-67.8)              | 23.8 (10.0-39.4) | 0.008       | 60.5      | 25.6 (18.8-46.3)             | 57.5 (40.0-68.8)              | 27.5 (8.8-40.3)  | 0.04        | 49.6      |
| AC or CC              | 55 | 35.0 (20.0-51.3)             | 58.8 (32.5-68.8)              | 17.5 (5.0-22.5)  |             |           | 35.0 (20.0-48.8)             | 55.0 (41.3-65.0)              | 16.3 (6.3-26.3)  |             |           |
| AA or AC              | 77 | 28.8 (17.5-50.0)             | 58.8 (33.1-68.8)              | 17.5 (7.5-30.0)  | 0.16        | NA        | 28.8 (19.4-47.5)             | 55.0 (41.3-66.3)              | 18.8 (8.8-33.8)  | 0.23        | NA        |
| CC                    | 12 | 36.3 (22.8-52.2)             | 53.8 (41.3-68.4)              | 15.6 (0.0-22.5)  |             |           | 39.4 (25.0-48.4)             | 53.1 (36.9-70.3)              | 15.0 (4.1-25.6)  |             |           |

***XPD c.934G>A***

|          |    |                  |                  |                  |      |    |                  |                  |                 |      |    |
|----------|----|------------------|------------------|------------------|------|----|------------------|------------------|-----------------|------|----|
| GG       | 48 | 34.4 (19.1-51.3) | 61.3 (44.1-69.7) | 16.3 (5.0-30.9)  | 0.94 | NA | 33.8 (21.3-48.8) | 57.5 (43.8-67.2) | 18.1 (8.8-28.8) | 0.81 | NA |
| GA or AA | 41 | 27.5 (17.5-46.3) | 56.3 (32.5-67.5) | 20.0 (10.6-26.3) |      |    | 30.0 (18.8-45.6) | 52.5 (36.9-67.5) | 18.8 (5.0-33.8) |      |    |
| GG or GA | 81 | 32.5 (18.1-50.0) | 58.8 (32.5-68.8) | 17.5 (5.0-27.5)  | 0.12 | NA | 30.0 (20.0-48.1) | 55.0 (40.6-66.3) | 17.5 (6.9-29.4) | 0.14 | NA |
| AA       | 8  | 27.5 (18.-40.6)  | 53.1 (41.6-72.2) | 21.9 (21.3-38.4) |      |    | 31.9 (15.0-44.7) | 58.1 (45.3-91.9) | 35.0 (5.0-64.1) |      |    |

***XPD c.2251A>C***

|          |    |                  |                  |                  |      |    |                  |                  |                  |      |    |
|----------|----|------------------|------------------|------------------|------|----|------------------|------------------|------------------|------|----|
| AA       | 47 | 35.0 (18.8-51.3) | 60.0 (45.0-68.8) | 18.8 (7.5-28.8)  | 0.42 | NA | 33.8 (21.3-48.8) | 55.0 (40.6-67.8) | 16.3 (10.0-27.5) | 1.00 | NA |
| AC or CC | 42 | 27.5 (17.5-48.1) | 53.1 (30.9-67.5) | 17.5 (3.4-30.0)  |      |    | 28.8 (18.1-47.5) | 55.0 (41.3-66.3) | 22.5 (3.4-36.9)  |      |    |
| AA or AC | 80 | 29.4 (17.5-49.7) | 60.0 (35.0-68.8) | 18.1 (7.5-28.1)  | 0.38 | NA | 29.4 (20.0-47.2) | 55.0 (40.3-67.2) | 19.4 (9.1-30.0)  | 0.22 | NA |
| CC       | 9  | 35.0 (23.1-52.5) | 50.0 (35.6-75.0) | 10.0 (11.3-35.6) |      |    | 46.3 (20.6-55.6) | 55.0 (47.5-73.8) | 5.0 (1.9-50.0)   |      |    |

***XPF c.2505T>C***

|          |    |                  |                  |                  |      |    |                  |                  |                  |      |    |
|----------|----|------------------|------------------|------------------|------|----|------------------|------------------|------------------|------|----|
| TT       | 40 | 28.1 (15.0-45.0) | 58.8 (30.6-67.5) | 21.3 (6.3-30.9)  | 0.47 | NA | 26.9 (20.0-46.3) | 55.0 (33.1-65.9) | 20. (7.2-35.9)   | 0.62 | NA |
| TC or CC | 49 | 32.5 (20.0-51.9) | 58.8 (38.8-70.0) | 17.5 (6.3-26.3)  |      |    | 35.0 (19.4-48.8) | 57.5 (43.1-68.1) | 16.3 (6.9-28.1)  |      |    |
| TT or TC | 82 | 33.1 (18.4-50.3) | 59.4 (39.7-68.8) | 18.1 (5.0-29.1)  | 0.47 | NA | 31.3 (20.9-47.8) | 56.3 (42.5-67.8) | 18.1 (6.3-30.6)  | 0.39 | NA |
| CC       | 7  | 20.0 (10.0-28.8) | 38.8 (27.5-63.8) | 17.5 (10.0-41.3) |      |    | 16.3 (12.5-35.0) | 41.3 (31.3-66.3) | 22.5 (15.0-46.3) |      |    |

***ERCC1 c.354C>T***

|          |    |                  |                  |                  |      |    |                  |                  |                  |      |    |
|----------|----|------------------|------------------|------------------|------|----|------------------|------------------|------------------|------|----|
| CC       | 22 | 28.8 (18.8-51.6) | 57.5 (31.6-70.0) | 14.4 (2.5-32.8)  | 0.82 | NA | 37.5 (20.6-48.8) | 54.4 (42.5-68.4) | 15.0 (5.0-33.1)  | 0.64 | NA |
| CT or TT | 67 | 32.5 (17.5-50.0) | 58.8 (38.8-67.5) | 18.8 (7.5-28.8)  |      |    | 28.8 (20.0-46.3) | 55.0 (41.3-66.3) | 20.0 (8.8-32.5)  |      |    |
| CC or CT | 74 | 28.8 (18.8-50.3) | 57.5 (32.2-67.8) | 15.6 (5.0-26.9)  | 0.05 | NA | 29.4 (19.7-46.6) | 54.4 (39.7-66.6) | 18.8 (5.9-33.1)  | 0.80 | NA |
| TT       | 15 | 35.0 (16.3-48.8) | 65.0 (58.8-68.8) | 22.5 (17.5-38.8) |      |    | 40.0 (21.3-48.8) | 60.0 (53.8-68.8) | 20.0 (10.0-27.5) |      |    |

***MLH1 c.-93G>A***

|          |    |                  |                  |                  |      |    |                  |                  |                  |      |    |
|----------|----|------------------|------------------|------------------|------|----|------------------|------------------|------------------|------|----|
| GG       | 52 | 35.0 (17.5-52.5) | 63.8 (39.1-70.9) | 18.1 (7.5-29.7)  | 0.51 | NA | 40.0 (20.3-50.9) | 58.1 (42.5-68.8) | 18.8 (6.3-31.9)  | 0.43 | NA |
| GA or AA | 37 | 27.5 (19.4-44.4) | 52.5 (31.3-61.9) | 17.5 (5.0-28.1)  |      |    | 27.5 (16.3-39.4) | 53.8 (40.6-64.4) | 18.8 (10.6-32.5) |      |    |
| GG or GA | 86 | 31.3 (18.4-50.0) | 58.8 (33.4-68.8) | 18.1 (5.0-29.1)  | NE   | NA | 31.3 (20.0-47.5) | 55.0 (40.9-67.8) | 18.8 (6.3-30.6)  | NE   | NA |
| AA       | 3  | 26.3 (15.0-50.0) | 61.3 (43.8-61.3) | 17.5 (11.3-46.3) |      |    | 25.0 (12.5-25.0) | 53.8 (41.3-63.8) | 28.8 (16.3-51.3) |      |    |

***MSH2 c.211+9G>C***

|          |    |                  |                  |                  |      |    |                  |                  |                 |      |    |
|----------|----|------------------|------------------|------------------|------|----|------------------|------------------|-----------------|------|----|
| GG       | 22 | 26.3 (12.8-44.7) | 48.1 (38.1-73.9) | 17.5 (4.1-35.9)  | 0.97 | NA | 26.9 (17.2-49.7) | 51.9 (34.4-75.6) | 20.6 (4.7-40.6) | 0.54 | NA |
| GC or CC | 67 | 32.5 (20.0-50.0) | 58.8 (33.8-68.8) | 18.8 (7.5-26.3)  |      |    | 32.5 (20.0-47.5) | 55.0 (45.0-66.3) | 18.8 (8.8-28.8) |      |    |
| GG or GC | 69 | 28.8 (17.5-50.0) | 60.0 (43.8-68.8) | 20.0 (10.0-30.6) | 0.22 | NA | 28.8 (19.4-47.5) | 57.5 (42.5-68.1) | 20.0 (8.1-36.9) | 0.10 | NA |
| CC       | 20 | 34.4 (20.3-50.6) | 53.1 (30.0-68.4) | 11.3 (5.0-23.4)  |      |    | 34.4 (20.0-48.4) | 54.4 (33.1-65.9) | 11.3 (5.3-24.7) |      |    |

***MSH3 c.3133A>G***

|          |    |                  |                  |                 |      |    |                  |                  |                 |      |    |
|----------|----|------------------|------------------|-----------------|------|----|------------------|------------------|-----------------|------|----|
| AA       | 50 | 33.1 (20.0-50.3) | 61.3 (33.4-69.1) | 18.1 (5.0-27.2) | 0.64 | NA | 34.4 (19.7-48.8) | 57.5 (48.1-67.8) | 18.8 (8.8-32.5) | 0.67 | NA |
| AG or GG | 39 | 27.5 (13.8-48.8) | 56.3 (40.0-65.0) | 17.5 (7.5-31.3) |      |    | 28.8 (20.0-46.3) | 50.0 (48.1-67.8) | 18.8 (5.0-30.0) |      |    |
| AA or AG | 82 | 32.5 (20.0-50.0) | 60.0 (38.8-68.8) | 17.5 (6.9-30.0) | 0.93 | NA | 31.3 (20.0-47.5) | 57.5 (42.5-67.8) | 18.8 (7.2-33.1) | 0.48 | NA |
| GG       | 7  | 10.0 (3.8-48.8)  | 45.0 (25.0-46.3) | 21.3 (1.3-28.8) |      |    | 12.5 (7.5-48.8)  | 32.5 (27.5-53.8) | 18.8 (5.0-23.8) |      |    |

***EXO1 c.1762G>A***

|          |    |                  |                  |                  |      |    |                  |                  |                 |      |    |
|----------|----|------------------|------------------|------------------|------|----|------------------|------------------|-----------------|------|----|
| GG       | 35 | 30.0 (17.5-50.0) | 50.0 (30.0-67.5) | 12.5 (5.0-23.8)  | 0.06 | NA | 30.0 (18.8-47.5) | 53.8 (31.3-68.8) | 15.0 (5.0-36.3) | 0.32 | NA |
| GA or AA | 54 | 30.6 (18.8-50.0) | 61.3 (44.7-69.1) | 21.3 (10.0-32.5) |      |    | 30.0 (20.9-47.8) | 57.5 (43.4-66.6) | 21.3 (9.7-30.6) |      |    |
| GG or GA | 79 | 30.0 (17.5-50.0) | 57.5 (32.5-68.8) | 17.5 (5.0-26.3)  | 0.08 | NA | 30.0 (18.8-47.5) | 55.0 (40.0-66.3) | 18.8 (6.3-28.8) | 0.21 | NA |
| AA       | 10 | 31.3 (19.7-51.3) | 62.5 (56.6-70.6) | 26.9 (16.9-41.3) |      |    | 34.4 (23.1-51.3) | 65.0 (52.8-77.2) | 28.1 (9.7-41.6) |      |    |

***P53 c.215G>C***

|    |    |                  |                  |                 |      |    |                  |                  |                 |      |    |
|----|----|------------------|------------------|-----------------|------|----|------------------|------------------|-----------------|------|----|
| GG | 40 | 35.0 (17.8-50.9) | 60.6 (45.3-69.7) | 18.1 (5.0-29.7) | 0.46 | NA | 36.9 (19.1-50.6) | 58.8 (40.6-69.7) | 18.1 (5.3-27.2) | 0.37 | NA |
|----|----|------------------|------------------|-----------------|------|----|------------------|------------------|-----------------|------|----|

|                                   |    |                  |                  |                  |      |    |                  |                  |                  |      |    |
|-----------------------------------|----|------------------|------------------|------------------|------|----|------------------|------------------|------------------|------|----|
| GC or CC                          | 49 | 27.5 (18.8-50.0) | 57.5 (32.5-67.5) | 17.5 (10.0-28.1) |      |    | 28.8 (20.0-43.1) | 53.8 (41.3-65.6) | 18.8 (9.4-33.8)  |      |    |
| GG or GC                          | 79 | 32.5 (17.5-50.0) | 58.8 (33.8-68.8) | 17.5 (5.0-26.3)  | 0.21 | NA | 30.0 (20.0-47.5) | 55.0 (41.3-66.3) | 17.5 (6.3-28.8)  | 0.06 | NA |
| CC                                | 10 | 23.8 (19.4-45.0) | 60.0 (37.2-64.7) | 23.8 (9.7-34.7)  |      |    | 27.5 (16.9-42.2) | 55.6 (42.5-73.8) | 32.5 (13.1-41.6) |      |    |
| <b><i>FAS</i> c.-671A&gt;G</b>    |    |                  |                  |                  |      |    |                  |                  |                  |      |    |
| AA                                | 30 | 27.5 (16.9-45.0) | 54.4 (30.9-64.1) | 17.5 (8.8-30.6)  | 0.89 | NA | 25.0 (19.7-46.3) | 52.5 (31.9-61.6) | 18.8 (3.8-29.1)  | 0.23 | NA |
| AG or GG                          | 59 | 35.0 (18.8-51.3) | 61.3 (38.8-70.0) | 17.5 (5.0-28.8)  |      |    | 32.5 (20.0-48.8) | 58.8 (42.5-68.8) | 18.8 (10.0-35.0) |      |    |
| AA or AG                          | 66 | 28.1 (17.5-50.0) | 58.1 (37.5-67.8) | 18.8 (6.9-30.3)  | 0.69 | NA | 29.4 (19.7-47.5) | 54.4 (40.0-66.3) | 18.8 (6.3-29.1)  | 0.45 | NA |
| GG                                | 23 | 35.0 (20.0-50.0) | 63.8 (32.5-68.8) | 17.5 (2.5-26.3)  |      |    | 30.0 (21.3-47.5) | 62.5 (42.5-68.8) | 18.8 (7.5-52.5)  |      |    |
| <b><i>FAS</i> c.-1378G&gt;A</b>   |    |                  |                  |                  |      |    |                  |                  |                  |      |    |
| GG                                | 65 | 28.8 (18.1-51.3) | 58.8 (41.9-68.8) | 20.0 (5.0-30.6)  | 0.85 | NA | 30.0 (18.8-48.8) | 57.5 (41.9-66.3) | 18.8 (6.3-33.8)  | 0.90 | NA |
| GA or AA                          | 24 | 31.3 (17.8-46.9) | 48.1 (30.3-68.4) | 17.5 (10.3-25.6) |      |    | 29.4 (21.6-45.0) | 48.8 (40.3-69.7) | 18.1 (8.8-27.5)  |      |    |
| GG or GA                          | 84 | 32.5 (18.8-50.0) | 58.8 (39.1-68.8) | 19.4 (7.5-29.7)  | 0.91 | NA | 31.3 (20.0-47.5) | 55.0 (42.5-67.2) | 18.8 (7.8-31.9)  | 0.53 | NA |
| AA                                | 5  | 20.0 (5.0-38.8)  | 31.3 (15.6-63.1) | 11.3 (0.6-34.4)  |      |    | 20.0 (10.0-38.8) | 38.8 (13.8-67.5) | 8.8 (0.6-38.1)   |      |    |
| <b><i>FASL</i> c.-844C&gt;T</b>   |    |                  |                  |                  |      |    |                  |                  |                  |      |    |
| CC                                | 28 | 26.9 (20.0-40.3) | 56.9 (40.0-68.8) | 21.3 (12.8-30.9) | 0.27 | NA | 29.4 (16.9-40.0) | 55.0 (41.3-64.7) | 19.4 (11.3-27.2) | 0.61 | NA |
| CT or TT                          | 61 | 35.0 (17.5-51.3) | 61.3 (33.1-68.8) | 17.5 (5.0-27.5)  |      |    | 30.0 (20.6-48.8) | 55.0 (41.3-68.8) | 18.8 (5.0-33.8)  |      |    |
| CC or CT                          | 66 | 33.1 (18.8-51.3) | 60.0 (45.0-70.0) | 19.4 (6.9-31.6)  | 0.38 | NA | 34.4 (20.0-49.1) | 57.5 (45.9-67.8) | 19.4 (8.4-30.6)  | 0.66 | NA |
| TT                                | 23 | 26.3 (17.5-42.5) | 38.8 (25.0-67.5) | 12.5 (5.0-25.0)  |      |    | 28.8 (18.8-40.0) | 46.3 (27.5-66.3) | 16.3 (5.0-35.0)  |      |    |
| <b><i>CASP3</i> c.-1191A&gt;G</b> |    |                  |                  |                  |      |    |                  |                  |                  |      |    |
| AA                                | 36 | 30.6 (20.0-50.0) | 59.4 (35.0-66.9) | 18.8 (8.1-30.0)  | 0.60 | NA | 28.8 (20.3-48.8) | 56.3 (42.8-68.1) | 23.1 (7.8-33.8)  | 0.17 | NA |
| AG or GG                          | 53 | 30.0 (16.9-50.0) | 58.8 (35.6-68.8) | 17.5 (5.0-27.5)  |      |    | 30.0 (17.5-46.9) | 55.0 (40.0-66.9) | 16.3 (5.0-31.3)  |      |    |

|                               |    |                  |                  |                  |      |    |                  |                  |                 |      |    |
|-------------------------------|----|------------------|------------------|------------------|------|----|------------------|------------------|-----------------|------|----|
| AA or AG                      | 79 | 28.8 (17.5-50.0) | 58.8 (33.8-67.5) | 17.5 (7.5-28.8)  | 1.00 | NA | 28.8 (18.8-46.3) | 55.0 (40.0-66.3) | 18.8 (6.3-32.5) | 0.86 | NA |
| GG                            | 10 | 40.6 (24.7-60.9) | 68.8 (51.3-73.4) | 20.0 (0.3-35.9)  |      |    | 43.8 (21.9-70.6) | 63.8 (50.9-85.0) | 15.0 (7.8-32.2) |      |    |
| <b>CASP3 c.-182-247G&gt;T</b> |    |                  |                  |                  |      |    |                  |                  |                 |      |    |
| GG                            | 33 | 27.5 (20.0-47.5) | 50.0 (30.6-68.1) | 11.3 (1.9-27.5)  | 0.05 | NA | 28.8 (20.6-47.5) | 52.5 (36.9-65.6) | 15.0 (4.4-30.6) | 0.29 | NA |
| GT or TT                      | 56 | 33.1 (17.5-50.0) | 61.3 (44.1-68.8) | 20.0 (11.3-30.0) |      |    | 33.8 (18.8-47.5) | 57.5 (44.1-68.8) | 20.0 (7.8-31.9) |      |    |
| GG or GT                      | 78 | 31.3 (18.8-50.3) | 58.8 (33.4-68.8) | 17.5 (5.0-29.1)  | 0.30 | NA | 30.0 (20.0-47.8) | 55.0 (41.3-68.8) | 16.9 (6.3-32.5) | 0.78 | NA |
| TT                            | 11 | 28.8 (11.3-43.8) | 60.0 (40.0-63.8) | 21.3 (15.0-32.5) |      |    | 33.8 (11.3-40.0) | 57.5 (30.0-63.8) | 20.0 (7.5-26.3) |      |    |

---

N: number of patients; PA: power analysis; IQR: interquartile range; NA: not applied. Multiple linear regression with audiometric patterns were adjusted for cumulative cisplatin dose.
