# Supplementary material for: Association of Clinical Aspects and Genetic Variants with the Severity of Cisplatin-Induced Ototoxicity in Head and Neck Squamous Cell Carcinoma: A Prospective Cohort Study
Source: MDPI journal article supplement (doi:10.3390/cancers15061759), 2023-03-14
Supplement: s1 [file s1]

**Table S5.** Single nucleotide variants and hearing impairment (according to NCI criteria - NCI CTCAE v4.0) related to cisplatin-based chemoradiation.

| Variable                 | N  | Ototoxicity       |                 |                   |                         |        |
|--------------------------|----|-------------------|-----------------|-------------------|-------------------------|--------|
|                          |    | Grade 0-2<br>N(%) | Grade 3<br>N(%) | OR (95% CI)       | p-value                 | PA (%) |
| <i>GSTM1</i>             |    |                   |                 |                   |                         |        |
| Present                  | 40 | 29 (46.0)         | 11 (42.3)       | Reference         |                         |        |
| Null                     | 49 | 34 (54.0)         | 15 (57.7)       | 1.30 (0.47-3.59)  | 0.60                    | NA     |
| <i>GSTT1</i>             |    |                   |                 |                   |                         |        |
| Present                  | 75 | 51 (81.0)         | 24 (92.3)       | Reference         |                         |        |
| Null                     | 14 | 12 (19.0)         | 2 (7.7)         | 0.47 (0.09-24.05) | 0.36                    | NA     |
| <i>GSTP1 c.313A&gt;G</i> |    |                   |                 |                   |                         |        |
| AA                       | 40 | 33 (52.4)         | 7(26.9)         | Reference         | <b>0.01<sup>1</sup></b> | 65     |
| AG or GG                 | 49 | 30 (47.6)         | 19 (73.1)       | 4.20 (1.34-13.16) |                         |        |
| AA or AG                 | 84 | 60 (95.2)         | 24 (92.3)       | Reference         | 0.57                    | NA     |
| GG                       | 5  | 3 (4.8)           | 2 (7.7)         | 1.72 (0.25-11.64) |                         |        |
| <i>XPC c.2815A&gt;C</i>  |    |                   |                 |                   |                         |        |
| AA                       | 34 | 18 (28.6)         | 16 (61.5)       | 3.13 (1.27-7.70)  | <b>0.01<sup>2</sup></b> | 65     |
| AC or CC                 | 55 | 45 (71.4)         | 10 (38.5)       | Reference         |                         |        |
| AA or AC                 | 77 | 53 (84.1)         | 24 (92.3)       | Reference         | 0.57                    | NA     |
| CC                       | 12 | 10 (15.9)         | 2 (7.7)         | 0.62 (0.12-3.26)  |                         |        |
| <i>XPB c.934G&gt;A</i>   |    |                   |                 |                   |                         |        |
| GG                       | 48 | 33 (52.4)         | 15 (57.7)       | Reference         | 0.51                    | NA     |
| GA or AA                 | 41 | 30 (47.6)         | 11 (42.3)       | 0.71 (0.26-1.93)  |                         |        |
| GG or GA                 | 81 | 59 (93.7)         | 22 (84.6)       | Reference         | 0.21                    | NA     |
| AA                       | 8  | 4 (6.3)           | 4 (15.4)        | 2.66 (0.56-12.57) |                         |        |
| <i>XPB c.2251A&gt;C</i>  |    |                   |                 |                   |                         |        |
| AA                       | 47 | 34 (54.0)         | 13 (50.0)       | Reference         | 0.68                    | NA     |
| AC or CC                 | 42 | 29 (46.0)         | 13 (50.0)       | 1.22 (0.46-3.25)  |                         |        |
| AA or AC                 | 80 | 57 (90.5)         | 23 (88.5)       | Reference         | 0.42                    | NA     |
| CC                       | 9  | 6 (9.5)           | 3 (11.5)        | 1.89 (0.39-9.10)  |                         |        |

|                                  |    |           |            |                   |      |    |
|----------------------------------|----|-----------|------------|-------------------|------|----|
| <b><i>XPF c.2505T&gt;C</i></b>   |    |           |            |                   |      |    |
| TT                               | 40 | 28 (44.4) | 12 (46.2)  | Reference         | 0.75 | NA |
| TC or CC                         | 49 | 35 (55.6) | 14 (53.8)  | 0.85 (0.31-2.29)  |      |    |
| TT or TC                         | 82 | 58 (92.1) | 24 (92.3)  | Reference         | 0.81 | NA |
| CC                               | 7  | 5 (7.9)   | 2 (7.7)    | 1.24 (0.20-7.41)  |      |    |
| <b><i>ERCC1 c.354C&gt;T</i></b>  |    |           |            |                   |      |    |
| CC                               | 22 | 15 (23.8) | 7 (26.9)   | Reference         | 0.90 | NA |
| CT or TT                         | 67 | 48 (76.2) | 19 (73.1)  | 1.07 (0.34-3.35)  |      |    |
| CC or CT                         | 74 | 52 (82.5) | 22 (84.6)  | Reference         | 0.84 | NA |
| TT                               | 15 | 11 (17.5) | 4 (15.4)   | 1.14 (0.31-4.22)  |      |    |
| <b><i>MLH1 c.-93G&gt;A</i></b>   |    |           |            |                   |      |    |
| GG                               | 52 | 35 (55.6) | 17 (65.4)  | Reference         | 0.43 | NA |
| GA or AA                         | 37 | 28 (44.4) | 9 (34.6)   | 0.65 (0.23-1.87)  |      |    |
| GG or GA                         | 86 | 61 (96.8) | 25 (96.2)  | Reference         | 0.55 | NA |
| AA                               | 3  | 2 (3.2)   | 1 (3.8)    | 2.15 (0.16-27.58) |      |    |
| <b><i>MSH2 c.211+9G&gt;C</i></b> |    |           |            |                   |      |    |
| GG                               | 22 | 14 (22.2) | 8 (30.8)   | Reference         | 0.36 | NA |
| GC or CC                         | 67 | 49 (77.8) | 18 (69.2)  | 0.60 (0.20-1.80)  |      |    |
| GG or GC                         | 69 | 47 (74.6) | 22 (84.6)  | Reference         | 0.35 | NA |
| CC                               | 20 | 16 (25.4) | 4 (15.4)   | 0.54 (0.15-1.96)  |      |    |
| <b><i>MSH3 c.3133A&gt;G</i></b>  |    |           |            |                   |      |    |
| AA                               | 50 | 35 (55.6) | 15 (57.7)  | Reference         | 0.35 | NA |
| AG or GG                         | 39 | 28 (44.4) | 11 (42.3)  | 0.61 (0.22-1.71)  |      |    |
| AA or AG                         | 82 | 56 (88.9) | 26 (100.0) | NE                | NE   | NA |
| GG                               | 7  | 7 (11.1)  | 0 (0.0)    |                   |      |    |
| <b><i>EXO1 c.1762G&gt;A</i></b>  |    |           |            |                   |      |    |
| GG                               | 35 | 27 (42.9) | 8 (30.8)   | Reference         | 0.47 | NA |
| GA or AA                         | 54 | 36 (57.1) | 18 (69.2)  | 1.46 (0.52-4.12)  |      |    |
| GG or GA                         | 79 | 59 (93.7) | 20 (76.9)  | Reference         | 0.13 | NA |
| AA                               | 10 | 4 (6.3)   | 6 (23.1)   | 3.00 (0.71-12.73) |      |    |
| <b><i>P53 c.215G&gt;C</i></b>    |    |           |            |                   |      |    |
| GG                               | 40 | 29 (46.0) | 11 (42.3)  | Reference         | 0.84 | NE |

|                                      |    |           |           |                   |      |    |
|--------------------------------------|----|-----------|-----------|-------------------|------|----|
| GC or CC                             | 49 | 34 (54.0) | 15 (57.7) | 1.10 (0.41-2.94)  |      |    |
| GG or GC                             | 79 | 59 (93.7) | 20 (76.9) | Reference         | 0.09 | NA |
| CC                                   | 10 | 4 (6.3)   | 6 (23.1)  | 3.63 (0.81-16.21) |      |    |
| <b><i>FAS</i> c.-671A&gt;G</b>       |    |           |           |                   |      |    |
| AA                                   | 30 | 22 (34.9) | 8 (30.8)  | Reference         | 0.91 | NA |
| AG or GG                             | 59 | 41 (65.1) | 18 (69.2) | 1.06 (0.36-3.06)  |      |    |
| AA or AG                             | 66 | 46 (73.0) | 20 (76.9) | Reference         | 0.41 | NA |
| GG                                   | 23 | 17 (27.0) | 6 (23.1)  | 0.61 (0.19-1.98)  |      |    |
| <b><i>FAS</i> c.-1378G&gt;A</b>      |    |           |           |                   |      |    |
| GG                                   | 65 | 46 (73.0) | 19 (73.1) | Reference         | 0.50 | NA |
| GA or AA                             | 24 | 17 (27.0) | 7 (26.9)  | 0.67 (0.21-2.10)  |      |    |
| GG or GA                             | 84 | 59 (93.7) | 25 (96.2) | Reference         | 0.72 | NA |
| AA                                   | 5  | 4 (6.3)   | 1 (3.8)   | 0.65 (0.06-6.57)  |      |    |
| <b><i>FASL</i> c.-844C&gt;T</b>      |    |           |           |                   |      |    |
| CC                                   | 28 | 20 (31.7) | 8 (30.8)  | Reference         | 0.78 | NA |
| CT or TT                             | 61 | 43 (68.3) | 18 (69.2) | 0.86 (0.30-2.46)  |      |    |
| CC or CT                             | 66 | 45 (71.4) | 21 (80.8) | Reference         | 0.11 | NA |
| TT                                   | 23 | 18 (28.6) | 5 (19.2)  | 0.33 (0.08-1.32)  |      |    |
| <b><i>CASP3</i> c.-1191A&gt;G</b>    |    |           |           |                   |      |    |
| AA                                   | 36 | 23 (36.5) | 13 (50.0) | Reference         | 0.52 | NA |
| AG or GG                             | 53 | 40 (63.5) | 13 (50.0) | 0.72 (0.26-1.95)  |      |    |
| AA or AG                             | 79 | 57 (90.5) | 22 (84.6) | Reference         | 0.39 | NA |
| GG                                   | 10 | 6 (9.5)   | 4 (15.4)  | 1.91 (0.42-8.53)  |      |    |
| <b><i>CASP3</i> c.-182-247G&gt;T</b> |    |           |           |                   |      |    |
| GG                                   | 33 | 24 (38.1) | 9 (34.6)  | Reference         | 0.82 | NA |
| GT or TT                             | 56 | 39 (61.9) | 17 (65.4) | 1.12 (0.40-3.16)  |      |    |
| GG or GT                             | 78 | 54 (85.7) | 24 (92.3) | Reference         | 0.62 | NA |
| TT                                   | 11 | 9 (14.3)  | 2 (7.7)   | 0.65 (0.12-3.50)  |      |    |

N: number of patients; NCI: National Cancer Institute; PA: power analysis; G: grade; OR: odds ratio; CI: confidence interval; IQR: interquartile range; NA: not applied. Logistic multivariate regression in hearing impairment (ototoxicity) was adjusted by race and body mass index. <sup>1</sup>p bootstrap=0.01; <sup>2</sup>p bootstrap=0.007
