# Supplementary material for: Association of Clinical Aspects and Genetic Variants with the Severity of Cisplatin-Induced Ototoxicity in Head and Neck Squamous Cell Carcinoma: A Prospective Cohort Study
Source: MDPI journal article supplement (doi:10.3390/cancers15061759), 2023-03-14
Supplement: s1 [file s1]

**Table S6.** Associations for single nucleotide variants and hearing impairment (according to NCI criteria - NCI CTCAE v4.0) related to cisplatin-based chemoradiation.

| Variable                                           | N  | Ototoxicity |            |                     |                    |        |
|----------------------------------------------------|----|-------------|------------|---------------------|--------------------|--------|
|                                                    |    | Grade 0-2   | Grade 3    | OR (95% CI)         | p-value            | PA (%) |
|                                                    |    | N(%)        | N(%)       |                     |                    |        |
| <b><i>GSTM1 + XPC c.2815A&gt;C</i></b>             |    |             |            |                     |                    |        |
| Present + CC                                       | 6  | 5 (14.7)    | 1 (6.7)    | Reference           | 0.66               | NA     |
| Null + AA or AC                                    | 43 | 29 (85.3)   | 14 (93.3)  | 1.68 (0.16-17.30)   |                    |        |
| <b><i>GSTM1 + XPC c.2815A&gt;C</i></b>             |    |             |            |                     |                    |        |
| Present + AC or CC                                 | 22 | 19 (70.4)   | 3 (27.3)   | Reference           | 0.02 <sup>1</sup>  | 99     |
| Null + AA                                          | 16 | 8 (29.6)    | 8 (72.7)   | 8.19 (1.28-52.20)   |                    |        |
| <b><i>GSTM1 + EXO1 c.1762G&gt;A</i></b>            |    |             |            |                     |                    |        |
| Present + GG                                       | 13 | 12 (38.7)   | 1 (11.1)   | Reference           | 0.08               | NA     |
| Null + GA or AA                                    | 27 | 19 (61.3)   | 8 (88.9)   | 9.70 (0.74-126.01)  |                    |        |
| <b><i>GSTM1 + P53 c.215G&gt;C</i></b>              |    |             |            |                     |                    |        |
| Present + GG or GC                                 | 35 | 26 (96.3)   | 9 (69.2)   | Reference           | 0.05               | NA     |
| Null + CC                                          | 5  | 1 (3.7)     | 4 (30.8)   | 11.53 (0.92-144.35) |                    |        |
| <b><i>GSTM1 + FASL c.-844C&gt;T</i></b>            |    |             |            |                     |                    |        |
| Present + TT                                       | 13 | 11 (28.9)   | 2 (14.3)   | Reference           | 0.16               | NA     |
| Null + CC or CT                                    | 39 | 27 (71.1)   | 12 (85.7)  | 4.81 (0.52-44.07)   |                    |        |
| <b><i>GSTT1 + XPD c.2251A&gt;C</i></b>             |    |             |            |                     |                    |        |
| Present + AA                                       | 41 | 29 (80.6)   | 12 (92.3)  | Reference           | 0.48               | NA     |
| Null + AC or CC                                    | 8  | 7 (19.4)    | 1 (7.7)    | 0.45 (0.04-4.21)    |                    |        |
| <b><i>GSTT1 + MSH2 c.211+9G&gt;C</i></b>           |    |             |            |                     |                    |        |
| Present + GG or GC                                 | 60 | 40 (88.9)   | 20 (100.0) | NE                  | NE                 | NA     |
| Null + CC                                          | 5  | 5 (11.1)    | 0 (0.0)    |                     |                    |        |
| <b><i>GSTP1 c.313A&gt;G + XPC c.2815A&gt;C</i></b> |    |             |            |                     |                    |        |
| AA or AG + AC or CC                                | 54 | 44 (95.7)   | 10 (83.3)  | Reference           | 0.22               | NA     |
| GG + AA                                            | 4  | 2 (4.3)     | 2 (16.7)   | 3.70 (0.44-31.07)   |                    |        |
| <b><i>GSTP1 c.313A&gt;G + XPC c.2815A&gt;C</i></b> |    |             |            |                     |                    |        |
| AA + AC or CC                                      | 25 | 24 (72.7)   | 1 (9.1)    | Reference           | 0.004 <sup>2</sup> | 97     |
| AG or GG + AA                                      | 19 | 9 (27.3)    | 10 (90.9)  | 32.22 (3.09-335.52) |                    |        |
| <b><i>GSTP1 c.313A&gt;G + XPD c.934G&gt;A</i></b>  |    |             |            |                     |                    |        |
| AA + GG or GA                                      | 37 | 30 (96.8)   | 7 (63.6)   | Reference           | 0.02 <sup>3</sup>  | 92     |

|                                                            |    |           |           |                     |                     |    |
|------------------------------------------------------------|----|-----------|-----------|---------------------|---------------------|----|
| AG or GG + AA                                              | 5  | 1 (3.2)   | 4 (36.4)  | 19.44 (1.59-237.72) |                     |    |
| <b><i>GSTP1</i> c.313A&gt;G + <i>XPB</i> c.2251A&gt;C</b>  |    |           |           |                     |                     |    |
| AA + AA                                                    | 22 | 18 (56.3) | 4 (28.6)  | Reference           | 0.03 <sup>4</sup>   | 54 |
| AG or GG + AC or CC                                        | 24 | 14 (43.8) | 10 (71.4) | 6.35 (1.09-36.92)   |                     |    |
| <b><i>GSTP1</i> c.313A&gt;G + <i>MSH3</i> c.3133A&gt;G</b> |    |           |           |                     |                     |    |
| AA + AG or GG                                              | 19 | 15 (46.9) | 4 (25.0)  | Reference           | 0.04 <sup>5</sup>   | 54 |
| AG or GG + AA                                              | 29 | 17 (53.1) | 12 (75.0) | 5.99 (1.08-33.09)   |                     |    |
| <b><i>GSTP1</i> c.313A&gt;G + <i>EXO1</i> c.1762G&gt;A</b> |    |           |           |                     |                     |    |
| AA + GG or GA                                              | 37 | 31 (93.9) | 6 (54.5)  | Reference           | 0.01 <sup>6</sup>   | 81 |
| AG or GG + AA                                              | 7  | 2 (6.1)   | 5 (45.5)  | 12.08 (1.60-91.01)  |                     |    |
| <b><i>GSTP1</i> c.313A&gt;G + <i>P53</i> c.215G&gt;C</b>   |    |           |           |                     |                     |    |
| AA + GG                                                    | 14 | 12 (48.0) | 2 (16.7)  | Reference           | 0.04 <sup>7</sup>   | 64 |
| AG or GG + GC or CC                                        | 23 | 13 (52.0) | 10 (83.3) | 8.08 (1.06-61.29)   |                     |    |
| <b><i>GSTP1</i> c.313A&gt;G + <i>FAS</i> c.-671A&gt;G</b>  |    |           |           |                     |                     |    |
| AA + AA or AG                                              | 30 | 23 (76.7) | 7 (53.8)  | Reference           | 0.23                | NE |
| AG or GG + GG                                              | 13 | 7 (23.3)  | 6 (46.2)  | 2.52 (0.55-11.52)   |                     |    |
| <b><i>GSTP1</i> c.313A&gt;G + <i>FASL</i> c.-844C&gt;T</b> |    |           |           |                     |                     |    |
| AA + CT or TT                                              | 25 | 20 (74.1) | 5 (45.5)  | Reference           | 0.03 <sup>8</sup>   | 52 |
| AG or GG + CC                                              | 13 | 7 (25.9)  | 6 (54.5)  | 7.91 (1.17-53.13)   |                     |    |
| <b><i>XPC</i> c.2815A&gt;C + <i>XPB</i> c.2251A&gt;C</b>   |    |           |           |                     |                     |    |
| AC or CC + AA                                              | 27 | 22 (78.6) | 5 (38.5)  | Reference           | 0.01 <sup>9</sup>   | 63 |
| AA + AC or CC                                              | 14 | 6 (21.4)  | 8 (61.5)  | 8.79 (1.45-53.24)   |                     |    |
| <b><i>XPC</i> c.2815A&gt;C + <i>ERCC1</i> c.354C&gt;T</b>  |    |           |           |                     |                     |    |
| CC + CC or CT                                              | 12 | 10 (47.6) | 2 (33.3)  | NA                  | NA                  | NA |
| AA or AC + TT                                              | 15 | 11 (52.4) | 4 (66.7)  |                     |                     |    |
| <b><i>XPC</i> c.2815A&gt;C + <i>ERCC1</i> c.354C&gt;T</b>  |    |           |           |                     |                     |    |
| AC or CC + CC or CT                                        | 46 | 37 (92.5) | 9 (75.0)  | Reference           | 0.08                | NA |
| AA + TT                                                    | 6  | 3 (7.5)   | 3 (25.0)  | 5.26 (0.79-34.89)   |                     |    |
| <b><i>XPC</i> c.2815A&gt;C + <i>MSH3</i> c.3133A&gt;G</b>  |    |           |           |                     |                     |    |
| AC or CC + AG or GG                                        | 23 | 21 (65.6) | 2 (22.2)  | Reference           | 0.009 <sup>10</sup> | 88 |
| AA + AA                                                    | 18 | 11 (34.4) | 7 (77.8)  | 17.09 (2.02-144.32) |                     |    |
| <b><i>XPC</i> c.2815A&gt;C + <i>EXO1</i> c.1762G&gt;A</b>  |    |           |           |                     |                     |    |
| AC or CC + GG                                              | 26 | 23 (62.2) | 3 (21.4)  | Reference           | 0.02 <sup>11</sup>  | 60 |
| AA + GA or AA                                              | 25 | 14 (37.8) | 11 (78.6) | 6.32 (1.23-32.38)   |                     |    |

**XPC c.2815A>C + EXO1 c.1762G>A**

|               |    |          |          |                   |      |    |
|---------------|----|----------|----------|-------------------|------|----|
| CC + GG or GA | 11 | 9 (75.0) | 2 (25.0) | Reference         | 0.39 | NA |
| AA or AC + AA | 9  | 3 (25.0) | 6 (75.0) | 3.02 (0.24-37.85) |      |    |

**XPC c.2815A>C + EXO1 c.1762G>A**

|                     |    |           |          |                   |      |    |
|---------------------|----|-----------|----------|-------------------|------|----|
| AC or CC + GG or GA | 50 | 43 (95.6) | 7 (70.0) | Reference         | 0.07 | NA |
| AA + AA             | 5  | 2 (4.4)   | 3 (30.0) | 6.65 (0.81-54.51) |      |    |

**XPC c.2815A>C + P53 c.215G>C**

|               |    |           |          |                     |                    |    |
|---------------|----|-----------|----------|---------------------|--------------------|----|
| AC or CC + GG | 21 | 19 (70.4) | 2 (22.2) | Reference           | 0.03 <sup>12</sup> | 78 |
| AA + GC or CC | 15 | 8 (29.6)  | 7 (77.8) | 17.66 (1.24-249.83) |                    |    |

**XPC c.2815A>C + P53 c.215G>C**

|               |    |          |          |                     |      |    |
|---------------|----|----------|----------|---------------------|------|----|
| CC + GG or GC | 10 | 9 (75.0) | 1 (16.7) | Reference           | 0.07 | NA |
| AA or AC + CC | 8  | 3 (25.0) | 5 (83.3) | 14.46 (0.74-279.26) |      |    |

**XPC c.2815A>C + P53 c.215G>C**

|                     |    |            |          |    |    |    |
|---------------------|----|------------|----------|----|----|----|
| AC or CC + GG or GC | 49 | 41 (100.0) | 8 (66.7) | NA | NA | NA |
| AA + CC             | 4  | 0 (0.0)    | 4 (33.3) |    |    |    |

**XPC c.2815A>C + FAS c.-1378G>A**

|               |    |           |          |                   |      |    |
|---------------|----|-----------|----------|-------------------|------|----|
| AC or CC + GG | 39 | 31 (91.2) | 8 (61.5) | Reference         | 0.07 | NA |
| AA + GA or AA | 8  | 3 (8.8)   | 5 (38.5) | 4.69 (0.83-26.35) |      |    |

**XPC c.2815A>C + FAS c.-671A>G**

|               |    |           |           |                   |      |    |
|---------------|----|-----------|-----------|-------------------|------|----|
| AC or CC + AA | 15 | 12 (60.0) | 3 (21.4)  | Reference         | 0.08 | NA |
| AA + AG or GG | 19 | 8 (40.0)  | 11 (78.6) | 4.37 (0.81-23.46) |      |    |

**XPC c.2815A>C + FAS c.-671A>G**

|                     |    |           |          |                   |      |    |
|---------------------|----|-----------|----------|-------------------|------|----|
| AC or CC + AA or AG | 41 | 33 (86.8) | 8 (66.7) | Reference         | 0.20 | NA |
| AA + GG             | 9  | 5 (13.2)  | 4 (33.3) | 2.92 (0.55-15.56) |      |    |

**XPC c.2815A>C + FASL c.-844C>T**

|               |    |           |           |                     |                    |    |
|---------------|----|-----------|-----------|---------------------|--------------------|----|
| AC or CC + TT | 12 | 11 (50.0) | 1 (7.7)   | Reference           | 0.01 <sup>13</sup> | 82 |
| AA + CC or CT | 23 | 11 (50.0) | 12 (92.3) | 22.29 (1.79-276.99) |                    |    |

**XPC c.2815A>C + FASL c.-844C>T**

|                     |    |           |          |                   |                    |    |
|---------------------|----|-----------|----------|-------------------|--------------------|----|
| AC or CC + CT or TT | 35 | 28 (90.3) | 7 (58.3) | Reference         | 0.03 <sup>14</sup> | 55 |
| AA + CC             | 8  | 3 (9.7)   | 5 (41.7) | 7.05 (1.17-42.47) |                    |    |

**XPC c.2815A>C + CASP3 c.-182-247G>T**

|                     |    |           |           |                   |      |    |
|---------------------|----|-----------|-----------|-------------------|------|----|
| CC + CC             | 7  | 6 (14.6)  | 1 (5.9)   | Reference         | 0.45 | NA |
| AA or AC + CA or AA | 51 | 35 (85.4) | 16 (94.1) | 2.31 (0.25-21.26) |      |    |

**XPC c.2815A>C + CASP3 c.-182-247G>T**

|                                                         |    |           |           |                    |      |    |
|---------------------------------------------------------|----|-----------|-----------|--------------------|------|----|
| AC or CC + CC                                           | 22 | 17 (60.7) | 5 (29.4)  | Reference          | 0.06 | NA |
| AA + CA or AA                                           | 23 | 11 (39.3) | 12 (70.6) | 3.87 (0.93-16.03)  |      |    |
| <b><i>XPD c.934G&gt;A + EXO1 c.1762G&gt;A</i></b>       |    |           |           |                    |      |    |
| GG + GG or GA                                           | 42 | 30 (96.8) | 12 (80.0) | Reference          | 0.13 | NA |
| GA or AA + AA                                           | 4  | 1 (3.2)   | 3 (20.0)  | 6.50 (0.57-73.32)  |      |    |
| <b><i>XPD c.934G&gt;A + CASP3 c.-182-247G&gt;T</i></b>  |    |           |           |                    |      |    |
| GG or GA + CC                                           | 30 | 22 (91.7) | 8 (72.7)  | Reference          | 0.43 | NA |
| AA + CA or AA                                           | 5  | 2 (8.3)   | 3 (27.3)  | 2.57 (0.23-27.77)  |      |    |
| <b><i>XPD c.934G&gt;A + FAS c.-1378G&gt;A</i></b>       |    |           |           |                    |      |    |
| GG or GA + GG                                           | 61 | 44 (95.7) | 17 (89.5) | Reference          | 0.41 | NA |
| AA + GA or AA                                           | 4  | 2 (4.3)   | 2 (10.5)  | 2.42 (0.28-20.79)  |      |    |
| <b><i>XPD c.934G&gt;A + FAS c.-671A&gt;G</i></b>        |    |           |           |                    |      |    |
| GG or GA + AA                                           | 27 | 19 (95.0) | 8 (66.7)  | Reference          | 0.12 | NA |
| AA + AG or GG                                           | 5  | 1 (5.0)   | 4 (33.3)  | 8.01 (0.56-113.81) |      |    |
| <b><i>XPD c.934G&gt;A + FASL c.-844C&gt;T</i></b>       |    |           |           |                    |      |    |
| GG or GA + TT                                           | 21 | 17 (85.0) | 4 (57.1)  | Reference          | 0.39 | NA |
| AA + CC or CT                                           | 6  | 3 (15.0)  | 3 (42.9)  | 2.98 (0.24-36.20)  |      |    |
| <b><i>XPD c.2251A&gt;C + EXO1 c.1762G&gt;A</i></b>      |    |           |           |                    |      |    |
| AA + GG or GA                                           | 41 | 31 (96.9) | 10 (76.9) | Reference          | 0.11 | NA |
| AC or CC + AA                                           | 4  | 1 (3.1)   | 3 (23.1)  | 6.91 (0.61-77.93)  |      |    |
| <b><i>XPD c.2251A&gt;C + CASP3 c.-1191A&gt;G</i></b>    |    |           |           |                    |      |    |
| AA or AC + AA                                           | 32 | 21 (84.0) | 11 (91.7) | Reference          | 0.74 | NA |
| CC + AG or GG                                           | 5  | 4 (16.0)  | 1 (8.3)   | 1.56 (0.10-23.47)  |      |    |
| <b><i>ERCC1 c.354C&gt;T + EXO1 c.1762G&gt;A</i></b>     |    |           |           |                    |      |    |
| CC or CT + GG                                           | 32 | 26 (72.2) | 6 (75.0)  | Reference          | 0.59 | NA |
| TT + GA or AA                                           | 12 | 10 (27.8) | 2 (25.0)  | 0.60 (0.09-3.84)   |      |    |
| <b><i>ERCC1 c.354C&gt;T + FASL c.-844C&gt;T</i></b>     |    |           |           |                    |      |    |
| CC or CT + TT                                           | 21 | 16 (64.0) | 5 (55.6)  | Reference          | 0.45 | NA |
| TT + CC or CT                                           | 13 | 9 (36.0)  | 4 (44.4)  | 1.92 (0.34-10.75)  |      |    |
| <b><i>ERCC1 c.354C&gt;T + FASL c.-844C&gt;T</i></b>     |    |           |           |                    |      |    |
| CC or CT + CT or TT                                     | 53 | 36 (90.0) | 17 (85.0) | Reference          | 0.42 | NA |
| TT + CC                                                 | 7  | 4 (10.0)  | 3 (15.0)  | 2.01 (0.35-11.24)  |      |    |
| <b><i>MLH1 c.-93G&gt;A + CASP3 c.-182-247G&gt;T</i></b> |    |           |           |                    |      |    |
| GG + CC                                                 | 18 | 12 (42.9) | 6 (50.0)  | Reference          | 0.67 | NA |

|                                                          |    |           |           |                     |                    |      |
|----------------------------------------------------------|----|-----------|-----------|---------------------|--------------------|------|
| GA or AA + CA or AA                                      | 22 | 16 (57.1) | 6 (50.0)  | 0.73 (0.17-3.08)    |                    |      |
| <b><i>MSH2 c.211+9G&gt;C + EXO1 c.1762G&gt;A</i></b>     |    |           |           |                     |                    |      |
| GG + GG                                                  | 8  | 6 (17.6)  | 2 (14.3)  | Reference           | 0.78               | NA   |
| GC or CC + GA or AA                                      | 40 | 28 (82.4) | 12 (85.7) | 1.32 (0.18-9.58)    |                    |      |
| <b><i>EXO1 c.1762G&gt;A + P53 c.215G&gt;C</i></b>        |    |           |           |                     |                    |      |
| GG + GG or GC                                            | 31 | 24 (96.0) | 7 (58.3)  | Reference           | 0.01 <sup>15</sup> | 85   |
| GA or AA + CC                                            | 6  | 1 (4.0)   | 5 (41.7)  | 20.97 (1.66-264.08) |                    |      |
| <b><i>EXO1 c.1762G&gt;A + CASP3 c.-182-247G&gt;T</i></b> |    |           |           |                     |                    |      |
| GG + GG                                                  | 14 | 13 (34.2) | 1 (9.1)   | Reference           | 0.16               | NA   |
| GA or AA + GT or TT                                      | 35 | 25 (65.8) | 10 (90.9) | 5.95 (0.48-73.27)   |                    |      |
| <b><i>EXO1 c.1762G&gt;A + FASL c.-844C&gt;T</i></b>      |    |           |           |                     |                    |      |
| GG + TT                                                  | 12 | 11 (27.5) | 1 (6.7)   | Reference           | 0.06               | NA   |
| GA or AA + CC or CT                                      | 43 | 29 (72.5) | 14 (93.3) | 12.64 (0.84-189.32) |                    |      |
| <b><i>EXO1 c.1762G&gt;A + FASL c.-844C&gt;T</i></b>      |    |           |           |                     |                    |      |
| GG or GA + TT                                            | 20 | 17 (85.0) | 3 (42.9)  | Reference           | 0.06               | NA   |
| AA + CC or CT                                            | 7  | 3 (15.0)  | 4 (57.1)  | 11.45(0.88-148.86)  |                    |      |
| <b><i>EXO1 c.1762G&gt;A + FASL c.-844C&gt;T</i></b>      |    |           |           |                     |                    |      |
| GG + CT or TT                                            | 25 | 19 (61.3) | 6 (50.0)  | Reference           | 0.62               | NA   |
| GA or AA + CC                                            | 18 | 12 (38.7) | 6 (50.0)  | 1.41 (0.35-5.63)    |                    |      |
| <b><i>P53 c.215G&gt;C + CASP3 c.-182-247G&gt;T</i></b>   |    |           |           |                     |                    |      |
| GG + CC                                                  | 14 | 10 (33.3) | 4 (28.6)  | Reference           | 0.99               | NA   |
| GC or CC + CA or AA                                      | 30 | 20 (66.7) | 10 (71.4) | 1.01 (0.23-4.37)    |                    |      |
| <b><i>CASP3 c.-1191A&gt;G + FASL c.-844C&gt;T</i></b>    |    |           |           |                     |                    |      |
| AA or AG + TT                                            | 19 | 14 (87.5) | 5 (55.6)  | Reference           | 0.03               | 65.9 |
| GG + CC or CT                                            | 6  | 2 (12.5)  | 4 (44.4)  | 32.2 (1.18-874.27)  |                    |      |
| <b><i>CASP3 c.-182-247G&gt;T + FAS c.-671A&gt;G</i></b>  |    |           |           |                     |                    |      |
| CC + AA                                                  | 9  | 7 (22.6)  | 2 (15.4)  | Reference           | 0.88               | NA   |
| CA or AA + AG or GG                                      | 35 | 24 (77.4) | 11 (84.6) | 1.14 (0.17-7.39)    |                    |      |
| <b><i>CASP3 c.-182-247G&gt;T+FASL c.-844C&gt;T</i></b>   |    |           |           |                     |                    |      |
| CC + CT or TT                                            | 23 | 17 (56.7) | 6 (54.5)  | Reference           | 0.66               | NA   |
| CA or AA + CC                                            | 18 | 13 (43.3) | 5 (45.5)  | 1.40 (0.30-6.54)    |                    |      |

N: number of patients, PA: power analysis, G: grade of ototoxicity, OR: odds ratio (adjusted), CI: confidence interval, NA: not applied. Multivariate analysis in hearing impairment (ototoxicity) was adjusted by race and body mass index. <sup>1</sup>p bootstrap=0.01; <sup>2</sup>p

bootstrap=0.009; <sup>3</sup>p bootstrap=0.002; <sup>4</sup>p bootstrap=0.03; <sup>5</sup>p bootstrap=0.02; <sup>6</sup>p  
bootstrap=0.005; <sup>7</sup>p bootstrap=0.01; <sup>8</sup>p bootstrap=0.01; <sup>9</sup>p bootstrap=0.003; <sup>10</sup>p  
bootstrap=0.001; <sup>11</sup>p bootstrap=0.02; <sup>12</sup>p bootstrap=0.01; <sup>13</sup>p bootstrap=0.005; <sup>14</sup>p  
bootstrap=0.01; <sup>15</sup>p bootstrap=0.005
