# Supplementary material for: Association of Clinical Aspects and Genetic Variants with the Severity of Cisplatin-Induced Ototoxicity in Head and Neck Squamous Cell Carcinoma: A Prospective Cohort Study
Source: MDPI journal article supplement (doi:10.3390/cancers15061759), 2023-03-14
Supplement: s1 [file s1]

**Table S1.** Clinicopathological factors and minimum threshold averages for pure tone air conduction audiometry in high frequencies (3, 4, 6 and 8 kHz): linear regression coefficients.

| Variable                        | Right ear                          |         | Left ear                        |         |
|---------------------------------|------------------------------------|---------|---------------------------------|---------|
|                                 | Regression coefficient<br>(95% CI) | p-value | Regression coefficient (95% CI) | p-value |
| <b>Univariate analysis</b>      |                                    |         |                                 |         |
| Age (years)                     | -0.38 (-0.81 to 0.04)              | 0.07    | -0.11 (-0.55 to 0.32)           | 0.60    |
| Sex (male)                      | -16.58 (-3.15 to -30)              | 0.02    | -6.17 (-20.06 to 7.71)          | 0.38    |
| Race (non-white)                | -0.02 (-0.06 to 0)                 | 0.12    | -0.02 (-0.06 to 0)              | 0.20    |
| Tobacco consumption             | -1.56 (-25.6 to 23.50)             | 0.93    | 0.48 (-24.86 to 25.82)          | 0.97    |
| Alcohol consumption             | 6.28 (-6.38 to 18.3)               | 0.32    | -8.61 (-21.45 to 4.23)          | 0.18    |
| ECOG                            | 3.56 (-4.48 to 11.61)              | 0.38    | 6.36 (-1.59 to 14.32)           | 0.11    |
| BMI                             | -0.87 (-1.75 to 0.01)              | 0.05    | -1.02 (-1.89 to 0.14)           | 0.02    |
| Diabetes                        | -2.16 (-14.55 to 10.23)            | 0.73    | 2.02 (-10.42 to 14.47)          | 0.74    |
| Hypertension                    | 0.09 (-8.32 to 8.52)               | 0.98    | -4.49 (-12.90 to 3.91)          | 0.29    |
| Tumor location                  | 0.29 (-0.9 to 1.48)                | 0.62    | -0.01 (-1.21 to 1.18)           | 0.98    |
| Tumor side                      | 1.34 (-4.47 to 7.16)               | 0.64    | 1.81 (-4.02 to 7.64)            | 0.53    |
| Histological grade 3            | 0.29 (-10.85 to 10.85)             | 0.95    | 1.42 (-9.21 to 12.27)           | 0.79    |
| Tumor stage                     | 3.48 (-2.45 to 9.41)               | 0.24    | 5.30 (-0.59 to 11.20)           | 0.08    |
| cCDDP dose (mg/m <sup>2</sup> ) | 0.08 (0.005 to 0.16)               | 0.03    | 0.04 (-0.04 to 0.12)            | 0.31    |
| Radiotherapy dose (Gy)          | 0.17 (0.5 to 0.85)                 | 0.61    | 0.34 (-0.34 to 1.32)            | 0.32    |
| Supraclavicular fossa           | 0.002 (-0.002 to 0.007)            | 0.28    | 0.002 (-0.002 to 0.007)         | 0.35    |
| Facial (right and left)         | 0.004 (-0.002 to 0.011)            | 0.24    | 0.002 (-0.004 to 0.01)          | 0.44    |
| Boost (right and left)          | 0.006 (0.009 to 0.02)              | 0.41    | 0.003 (-0.01 to 0.02)           | 0.72    |
| Posterior (right and left)      | 0.002 (-0.001 to 0.007)            | 0.23    | 0.001 (-0.003 to 0.006)         | 0.48    |
| <b>Multivariate analysis</b>    |                                    |         |                                 |         |
| Age                             | -0.17 (-0.71 to 0.26)              | 0.41    | NA                              | NA      |
| BMI                             | -0.80 (-1.64 to 0.03)              | 0.06    | -0.87 (-1.77 to 0.20)           | 0.06    |

|                                 |                         |      |                       |      |
|---------------------------------|-------------------------|------|-----------------------|------|
| Sex (male)                      | -17.07 (-3.95 to -30.2) | 0.08 | -3.83 (-9.83 to 2.16) | 0.20 |
| cCDDP dose (mg/m <sup>2</sup> ) | 0.08 (0.01 to 0.16)     | 0.02 | NA                    | NA   |

BMI: body mass index; cCDDP: cumulative cisplatin; CI: confidence interval; ECOG: Eastern Cooperative Oncology Group performance status; Gy: Gray; mg: milligrams; NA: not applicable.
