# Supplementary material for: Association of Clinical Aspects and Genetic Variants with the Severity of Cisplatin-Induced Ototoxicity in Head and Neck Squamous Cell Carcinoma: A Prospective Cohort Study
Source: MDPI journal article supplement (doi:10.3390/cancers15061759), 2023-03-14
Supplement: s1 [file s1]

**Table S4.** Clinical characteristics of patients stratified by intensity of ototoxicity classified by NCI CTCAE v4.0 criteria

| Variable                       | Ototoxicity                     |                               |                   |         |
|--------------------------------|---------------------------------|-------------------------------|-------------------|---------|
|                                | Grade 0-2<br>Median (IQR), N(%) | Grade 3<br>Median (IQR), N(%) | OR (95%CI)        | p-value |
| <b>Univariate analysis</b>     |                                 |                               |                   |         |
| Age (years)                    | 58 (51-62)                      | 54 (47-57)                    | 0.97 (0.92-1.0)   | 0.26    |
| Gender (male)                  | 59 (93.7)                       | 23 (88.5)                     | 0.52 (0.10-2.5)   | 0.41    |
| Race (non-white)               | 3 (4.8)                         | 6 (23)                        | 6.0 (1.37-26.2)   | 0.01    |
| Tobacco consumption            | 61 (96.8)                       | 26 (100.0)                    | NA                | 0.36*   |
| Alcohol consumption            | 56 (88.9)                       | 25 (96.2)                     | 3.12 (0.36-32.76) | 0.29    |
| ECOG                           |                                 |                               | 1.57 (0.61-4.04)  | 0.34    |
| 0                              | 43 (68.3)                       | 15 (57.6)                     |                   |         |
| 1                              | 20 (31.7)                       | 11 (42.4)                     |                   |         |
| BMI                            | 19.7 (17.2-23.3)                | 17.8 (15.6-20.3)              | 0.86 (0.76-0.98)  | 0.03    |
| Diabetes                       | 6 (9.5%)                        | 3 (11.5%)                     | 1.23 (0.28-5.37)  | 0.77    |
| Hypertension                   | 18 (28.6%)                      | 6 (23.1%)                     | 0.75 (0.25-2.17)  | 0.59    |
| Tumor location                 | 40 (63.5%)                      | 15 (57.7%)                    | 1.06 (0.91-1.23)  | 0.39    |
| Tumor side                     |                                 |                               | 1.17 (0.58-2.37)  | 0.64    |
| Right                          | 26 (41.9)                       | 11 (42.3)                     |                   |         |
| Left                           | 31 (50)                         | 11 (42.3)                     |                   |         |
| Medial                         | 5 (8.1%)                        | 4 (15.4)                      |                   |         |
| Differentiation grade 3        | 10 (18.2)                       | 3 (17.6)                      | 0.96 (0.23-4.0)   | 0.96    |
| Tumor stage (AJCC)             |                                 |                               | 4.0 (0.9-16.2)    | 0.18    |
| I                              | 1 (1.6)                         | 0 (0.0)                       |                   |         |
| II                             | 5 (7.9)                         | 0 (0.0)                       |                   |         |
| III                            | 12 (19.0)                       | 2 (7.7)                       |                   |         |
| IV                             | 45 (71.4)                       | 24 (92.3)                     |                   |         |
| cDDP dose (mg/m <sup>2</sup> ) | 260 (200-300)                   | 260 (240-280)                 | 1.0 (0.99-1.01)   | 0.66    |
| <b>Multivariate analysis</b>   |                                 |                               |                   |         |
| Race (non-white)               |                                 |                               | 5.43 (1.21-24.27) | 0.02    |
| BMI                            |                                 |                               | 0.89 (0.72-0.98)  | 0.03    |

AJCC: American Joint Committee in Cancer; BMI: body mass index; cDDP: cumulative cisplatin; CI: confidence interval; ECOG: Eastern Cooperative Oncology Group performance status; NA: not applicable; OR: odds ratio. \*Since the proportion of smokers was close to 100% in this study, it was not possible to estimate odds ratio; in this case.
