# Supplementary material for: Association of Clinical Aspects and Genetic Variants with the Severity of Cisplatin-Induced Ototoxicity in Head and Neck Squamous Cell Carcinoma: A Prospective Cohort Study
Source: MDPI journal article supplement (doi:10.3390/cancers15061759), 2023-03-14
Supplement: s1 [file s1]

**Table S3.** Combinations of single nucleotide variants encoding cisplatin metabolism and their association with pure tone high-frequency threshold averages (3, 4, 6, and 8 KHz)

| Variable               | N  | Right ear                    |                               |                  |         | Left ear  |                              |                               |                  |         |           |
|------------------------|----|------------------------------|-------------------------------|------------------|---------|-----------|------------------------------|-------------------------------|------------------|---------|-----------|
|                        |    | Pretreatment<br>Median (IQR) | Posttreatment<br>Median (IQR) | Difference       | P-value | PA<br>(%) | Pretreatment<br>Median (IQR) | Posttreatment<br>Median (IQR) | Difference       | P-value | PA<br>(%) |
| GSTM1 + XPC c.2815A>C  |    |                              |                               |                  |         |           |                              |                               |                  |         |           |
| Present + CC           | 6  | 27.5 (17.8-63.1)             | 44.4 (23.8-67.5)              | 3.1 (5.0-24.1)   | 0.06    | NA        | 32.5 (15.0-55.6)             | 43.8 (25.0-60.6)              | 20.9 (5.0-27.5)  | 0.02    | 59        |
| Null + AA or AC        | 43 | 36.3 (18.8-50.0)             | 61.3 (43.8-67.5)              | 20.0 (12.5-30.0) |         |           | 33.8 (21.3-33.8)             | 58.8 (46.3-68.8)              | 36.3 (20.0-49.3) |         |           |
| GSTM1 + XPC c.2815A>C  |    |                              |                               |                  |         |           |                              |                               |                  |         |           |
| Present + AC or CC     | 22 | 26.9 (16.3-51.6)             | 42.5 (25.9-61.3)              | 6.3 (0.6-22.2)   | 0.01    | 59        | 24.4 (15.0-48.8)             | 51.3 (29.4-58.8)              | 6.3 (3.4-16.9)   | 0.03    | 51        |
| Null + AA              | 16 | 23.1 (11.9-44.1)             | 58.8 (47.2-64.1)              | 22.5 (6.3-37.2)  |         |           | 28.8 (20.3-46.3)             | 63.1 (41.3-68.8)              | 27.5 (5.0-40.0)  |         |           |
| GSTM1 + EXO1 c.1762G>A |    |                              |                               |                  |         |           |                              |                               |                  |         |           |
| Present + GG           | 13 | 21.3 (18.8-48.1)             | 31.3 (25.6-63.8)              | 5.0 (2.5-18.8)   | 0.008   | 75        | 23.8 (17.5-48.1)             | 38.8 (28.8-60.0)              | 8.8 (5.0-15.0)   | 0.005   | 85        |
| Null + GA or AA        | 27 | 37.5 (21.3-50.0)             | 62.5 (57.5-68.8)              | 21.3 (16.3-30.0) |         |           | 40.0 (25.0-48.8)             | 61.3 (52.5-68.8)              | 22.5 (11.3-28.8) |         |           |
| GSTM1 + P53 c.215G>C   |    |                              |                               |                  |         |           |                              |                               |                  |         |           |
| Present + GG or GC     | 35 | 27.5 (17.5-50.0)             | 57.5 (30.0-72.5)              | 11.3 (2.5-31.3)  | 0.06    | NA        | 23.8 (16.3-46.3)             | 53.8 (32.5-62.5)              | 15.0 (5.0-28.8)  | 0.02    | 57        |
| Null + CC              | 5  | 26.3 (20.6-48.1)             | 62.5 (60.0-66.3)              | 32.5 (18.1-41.3) |         |           | 28.8 (18.8-36.3)             | 66.3 (51.9-88.1)              | 40.0 (26.9-56.9) |         |           |
| GSTM1 + FASL c.-844C>T |    |                              |                               |                  |         |           |                              |                               |                  |         |           |
| Present + TT           | 13 | 26.3 (17.5-42.5)             | 31.3 (26.9-56.3)              | 11.3 (3.1-18.1)  | 0.05    | 54        | 23.8 (17.5-46.9)             | 38.8 (28.8-58.1)              | 15.0 (4.4-18.1)  | 0.07    | NA        |
| Null + CC or CT        | 39 | 37.5 (20.0-51.3)             | 61.3 (46.3-68.8)              | 18.8 (10.0-26.3) |         |           | 40.0 (23.8-52.5)             | 58.8 (48.8-70.0)              | 20.0 (11.3-27.5) |         |           |
| GSTT1 + XPD c.2251A>C  |    |                              |                               |                  |         |           |                              |                               |                  |         |           |
| Present + AA           | 41 | 35.0 (17.5-51.3)             | 61.3 (46.3-70.6)              | 21.3 (7.5-30.6)  | 0.05    | 61        | 33.8 (22.5-48.8)             | 55.0 (43.1-67.5)              | 17.5 (9.4-28.1)  | 0.04    | 56        |

|                                              |    |                  |                  |                  |       |    |                  |                   |                  |      |      |
|----------------------------------------------|----|------------------|------------------|------------------|-------|----|------------------|-------------------|------------------|------|------|
| Null + AC or CC                              | 8  | 28.8 (21.9-41.6) | 31.3 (27.2-54.4) | 6.9 (0.9-20.9)   |       |    | 35.0 (20.3-44.7) | 43.1 (35.9-54.4)  | 5.0 (3.1-23.4)   |      |      |
| <b>GSTT1 + MSH2 c.211+9G&gt;C</b>            |    |                  |                  |                  |       |    |                  |                   |                  |      |      |
| Present + GG or GC                           | 60 | 28.8 (16.6-50.0) | 61.3 (45.0-68.8) | 21.3 (10.0-32.5) | 0.09  | NA | 28.8 (19.1-47.5) | 57.5 (44.4-68.8)  | 21.3 (9.1-39.7)  | 0.04 | 62   |
| Null + CC                                    | 5  | 30.0 (20.6-43.8) | 30.0 (25.6-43.1) | 5.0 (11.3-13.1)  |       |    | 30.0 (18.1-50.0) | 38.8 (31.3-50.0)  | 8.8 (0.0-13.1)   |      |      |
| <b>GSTP1 c.313A&gt;G + XPC c.2815A&gt;C</b>  |    |                  |                  |                  |       |    |                  |                   |                  |      |      |
| AA or AG + AC or CC                          | 54 | 35.6 (20.0-51.6) | 58.8 (32.5-68.8) | 17.5 (5.0-23.1)  | 0.15  | NA | 36.9 (20.9-48.8) | 55.0 (42.2-65.6)  | 16.3 (6.3-26.3)  | 0.03 | 60   |
| GG + AA                                      | 4  | 23.1 (12.5-26.3) | 47.5 (36.6-81.9) | 32.5 (13.1-58.4) |       |    | 18.1 (5.0-27.5)  | 53.1 (34.4-90.6)  | 41.9 (19.7-65.9) |      |      |
| <b>GSTP1 c.313A&gt;G + XPC c.2815A&gt;C</b>  |    |                  |                  |                  |       |    |                  |                   |                  |      |      |
| AA + AC or CC                                | 25 | 28.8 (18.8-46.9) | 50.0 (30.0-65.6) | 17.5 (7.5-23.8)  | 0.005 | 88 | 33.8 (17.5-42.5) | 52.5 (38.1-62.5)  | 16.3 (8.8-23.8)  | 0.01 | 76   |
| AG or GG + AA                                | 19 | 20.0 (15.0-35.0) | 61.3 (50.0-67.5) | 30.0 (16.3-48.8) |       |    | 23.8 (13.8-41.3) | 62.5 (42.5-68.8)  | 38.8 (16.3-52.5) |      |      |
| <b>GSTP1 c.313A&gt;G + XPD c.934G&gt;A</b>   |    |                  |                  |                  |       |    |                  |                   |                  |      |      |
| AA + GG or GA                                | 37 | 32.5 (18.8-50.0) | 58.8 (29.4-67.5) | 15.0 (5.0-25.6)  | 0.02  | 65 | 30.0 (18.8-47.5) | 52.5 (39.4-63.1)  | 16.3 (8.1-26.9)  | 0.01 | 62   |
| AG or GG + AA                                | 5  | 26.3 (14.4-38.8) | 56.3 (50.0-78.1) | 30.0 (21.3-53.8) |       |    | 28.8 (8.1-43.1)  | 66.3 (47.5-103.1) | 53.8 (22.5-68.8) |      |      |
| <b>GSTP1 c.313A&gt;G + XPD c.2251A&gt;C</b>  |    |                  |                  |                  |       |    |                  |                   |                  |      |      |
| AA + AA                                      | 22 | 35.6 (24.7-51.3) | 58.8 (46.3-71.6) | 19.4 (6.9-26.3)  | 0.92  | NA | 34.4 (24.7-49.1) | 55.0 (43.1-66.3)  | 16.3 (9.7-26.6)  | 0.45 | NA   |
| AG or GG + AC or CC                          | 24 | 27.5 (19.1-51.9) | 59.4 (45.9-68.4) | 20.6 (3.1-42.2)  |       |    | 28.1 (20.0-51.3) | 63.1 (52.5-69.7)  | 27.5 (3.1-44.4)  |      |      |
| <b>GSTP1 c.313A&gt;G + MSH3 c.3133A&gt;C</b> |    |                  |                  |                  |       |    |                  |                   |                  |      |      |
| AA + AG or GG                                | 19 | 27.5 (12.5-48.8) | 46.3 (26.3-67.5) | 15.0 (7.5-25.0)  | 0.71  | NA | 26.3 (12.5-40.0) | 47.5 (31.3-65.0)  | 18.8 (3.8-27.5)  | 0.24 | NA   |
| AG or GG + AA                                | 29 | 27.5 (19.4-50.0) | 65.0 (33.1-70.0) | 20.0 (4.4-38.1)  |       |    | 28.8 (19.4-51.9) | 63.8 (53.1-72.5)  | 20.0 (7.5-46.9)  |      |      |
| <b>GSTP1 c.313A&gt;G + EXO1 c.1762G&gt;A</b> |    |                  |                  |                  |       |    |                  |                   |                  |      |      |
| AA + GG or GA                                | 37 | 30.0 (17.5-49.4) | 50.0 (29.4-67.5) | 15.0 (5.0-24.4)  | 0.06  | NA | 30.0 (18.8-45.6) | 48.8 (36.9-63.1)  | 18.8 (8.1-25.0)  | 0.03 | 59.8 |
| AG or GG + AA                                | 7  | 26.3 (18.8-43.8) | 63.8 (50.0-70.0) | 33.8 (20.0-41.3) |       |    | 28.8 (21.3-55.0) | 68.8 (50.0-87.5)  | 32.5 (16.3-46.3) |      |      |
| <b>GSTP1 c.313A&gt;G + P53 c.215G&gt;C</b>   |    |                  |                  |                  |       |    |                  |                   |                  |      |      |

|                                                            |    |                  |                  |                  |       |    |                  |                  |                  |      |    |
|------------------------------------------------------------|----|------------------|------------------|------------------|-------|----|------------------|------------------|------------------|------|----|
| AA + GG                                                    | 14 | 46.9 (15.6-58.4) | 59.4 (41.6-71.6) | 8.8 (3.4-23.4)   | 0.23  | NA | 41.9 (20.9-59.7) | 56.3 (43.4-67.8) | 15.0 (5.9-23.8)  | 0.08 | NA |
| AG or GG + GC or CC                                        | 23 | 27.5 (17.5-52.5) | 61.3 (40.0-68.8) | 20.0 (5.0-41.3)  |       |    | 28.8 (20.0-48.8) | 57.5 (52.5-68.8) | 27.5 (11.3-42.5) |      |    |
| <b><i>GSTP1</i> c.313A&gt;G + <i>FAS</i> c.-671A&gt;G</b>  |    |                  |                  |                  |       |    |                  |                  |                  |      |    |
| AA + AA or AG                                              | 30 | 28.8 (17.5-55.9) | 55.6 (36.3-64.7) | 16.3 (5.0-26.3)  | 0.67  | NA | 31.9 (19.7-47.8) | 53.1 (38.8-66.3) | 20.0 (9.7-27.5)  | 0.04 | 56 |
| AG or GG + GG                                              | 13 | 37.5 (19.4-51.3) | 67.5 (47.5-71.9) | 21.3 (0.6-39.4)  |       |    | 30.0 (21.3-48.1) | 66.3 (58.8-88.1) | 38.8 (13.1-53.8) |      |    |
| <b><i>GSTP1</i> c.313A&gt;G + <i>FASL</i> c.-844C&gt;T</b> |    |                  |                  |                  |       |    |                  |                  |                  |      |    |
| AA + CT or TT                                              | 25 | 32.5 (17.5-50.6) | 58.8 (26.9-67.5) | 11.3 (5.0-23.1)  | 0.13  | NA | 30.0 (19.4-48.8) | 52.5 (31.9-66.3) | 16.3 (5.6-28.1)  | 0.18 | NA |
| AG or GG + CC                                              | 13 | 25.0 (18.8-39.4) | 60.0 (38.8-70.0) | 22.5 (13.8-41.3) |       |    | 21.3 (15.0-40.6) | 58.8 (42.5-68.8) | 23.8 (11.3-46.9) |      |    |
| <b><i>XPC</i> c.2815A&gt;C + <i>XPB</i> c.2251A&gt;C</b>   |    |                  |                  |                  |       |    |                  |                  |                  |      |    |
| AC or CC + AA                                              | 27 | 36.3 (17.5-50.0) | 60.0 (43.8-68.8) | 18.8 (7.5-26.3)  | 0.07  | NA | 35.0 (21.3-48.8) | 55.0 (41.3-68.8) | 15.0 (10.0-26.3) | 0.07 | NA |
| AA + AC or CC                                              | 14 | 19.4 (10.9-31.3) | 56.9 (36.6-67.5) | 30.0 (10.9-49.4) |       |    | 22.5 (12.2-31.3) | 63.8 (37.2-70.0) | 36.9 (6.6-52.8)  |      |    |
| <b><i>XPC</i> c.2815A&gt;C + <i>ERCC1</i> c.354C&gt;T</b>  |    |                  |                  |                  |       |    |                  |                  |                  |      |    |
| CC + CC or CT                                              | 12 | 36.3 (22.8-52.2) | 53.8 (41.3-68.4) | 15.6 (0.0-22.5)  | 0.05  | 41 | 39.4 (25.0-48.4) | 53.1 (36.9-70.3) | 15.0 (4.1-25.6)  | 0.35 | NA |
| AA or AC + TT                                              | 15 | 35.0 (16.3-48.8) | 65.0 (58.8-68.8) | 22.5 (17.5-38.8) |       |    | 40.0 (21.3-48.8) | 60.0 (53.8-68.8) | 20.0 (10.0-27.5) |      |    |
| <b><i>XPC</i> c.2815A&gt;C + <i>ERCC1</i> c.354C&gt;T</b>  |    |                  |                  |                  |       |    |                  |                  |                  |      |    |
| AC or CC + CC or CT                                        | 46 | 33.8 (20.0-52.5) | 51.3 (30.9-68.8) | 14.4 (4.7-22.5)  | 0.002 | 61 | 34.4 (19.7-49.7) | 53.8 (39.7-65.6) | 15.0 (5.0-26.6)  | 0.33 | NA |
| AA + TT                                                    | 6  | 26.3 (10.3-52.5) | 65.0 (55.6-72.5) | 34.4 (16.6-54.1) |       |    | 36.3 (17.2-50.3) | 58.8 (53.1-69.4) | 18.8 (8.1-46.9)  |      |    |
| <b><i>XPC</i> c.2815A&gt;C + <i>MSH3</i> c.3133A&gt;G</b>  |    |                  |                  |                  |       |    |                  |                  |                  |      |    |
| AC or CC + AG or GG                                        | 23 | 28.8 (12.5-48.8) | 46.3 (27.5-65.0) | 15.0 (5.0-22.5)  | 0.10  | NA | 32.5 (12.5-47.5) | 48.8 (31.3-65.0) | 13.8 (5.0-22.5)  | 0.10 | NA |
| AA + AA                                                    | 18 | 27.5 (17.5-41.3) | 60.0 (32.8-68.8) | 22.5 (9.4-34.7)  |       |    | 29.4 (17.2-46.9) | 58.8 (39.7-69.4) | 18.8 (8.8-52.5)  |      |    |
| <b><i>XPC</i> c.2815A&gt;C + <i>EXO1</i> c.1762G&gt;A</b>  |    |                  |                  |                  |       |    |                  |                  |                  |      |    |
| AC or CC + GG                                              | 26 | 38.8 (20.0-52.5) | 45.6 (30.0-67.8) | 11.9 (2.5-21.6)  | 0.004 | 64 | 34.4 (19.7-49.7) | 53.1 (31.3-64.1) | 15.0 (5.0-22.8)  | 0.05 | 49 |
| AA + GA or AA                                              | 25 | 28.8 (18.8-50.6) | 61.3 (45.6-70.0) | 23.8 (10.0-36.9) |       |    | 26.3 (19.4-47.5) | 57.5 (41.3-66.3) | 27.5 (10.6-39.4) |      |    |

|                                                    |    |                  |                  |                  |      |    |                  |                  |                  |      |    |  |
|----------------------------------------------------|----|------------------|------------------|------------------|------|----|------------------|------------------|------------------|------|----|--|
| <b><i>XPC c.2815A&gt;C + EXO1 c.1762G&gt;A</i></b> |    |                  |                  |                  |      |    |                  |                  |                  |      |    |  |
| CC + GG or GA                                      | 11 | 35.0 (21.3-52.5) | 48.8 (40.0-70.0) | 21.3 (1.3-22.5)  | 0.04 | 51 | 38.8 (25.0-47.5) | 52.5 (35.0-71.3) | 18.8 (3.8-26.3)  | 0.12 | NA |  |
| AA or AC + AA                                      | 9  | 26.3 (19.4-47.5) | 63.8 (54.4)      | 32.5 (20.0-41.3) |      |    | 28.8 (22.5-47.5) | 66.3 (55.0-80.6) | 32.5 (13.1-43.1) |      |    |  |
| <b><i>XPC c.2815A&gt;C + EXO1 c.1762G&gt;A</i></b> |    |                  |                  |                  |      |    |                  |                  |                  |      |    |  |
| AC or CC + GG or GA                                | 50 | 33.1 (20.0-50.6) | 55.0 (30.9-68.8) | 16.3 (4.7-22.5)  | 0.03 | 50 | 33.8 (20.0-47.5) | 54.4 (39.7-65.0) | 15.6 (5.9-24.4)  | 0.07 | NA |  |
| AA + AA                                            | 5  | 26.3 (19.4-38.8) | 61.3 (46.3-70.0) | 32.5 (14.4-45.0) |      |    | 26.3 (22.5-39.4) | 66.3 (50.0-71.3) | 40.0 (13.1-46.3) |      |    |  |
| <b><i>XPC c.2815A&gt;C + P53 c.215G&gt;C</i></b>   |    |                  |                  |                  |      |    |                  |                  |                  |      |    |  |
| AC or CC + GG                                      | 21 | 43.8 (20.6-51.9) | 60.0 (38.8-70.0) | 17.5 (4.4-22.5)  | 0.03 | 51 | 45.0 (22.5-54.4) | 62.5 (40.0-69.4) | 15.0 (5.0-23.1)  | 0.04 | 63 |  |
| AA + GC or CC                                      | 15 | 28.8 (17.5-41.3) | 58.8 (38.8-67.5) | 23.8 (11.3-38.8) |      |    | 28.8 (20.0-41.3) | 60.0 (40.0-66.3) | 28.8 (10.0-40.0) |      |    |  |
| <b><i>XPC c.2815A&gt;C + P53 c.215G&gt;C</i></b>   |    |                  |                  |                  |      |    |                  |                  |                  |      |    |  |
| CC + GG or GC                                      | 10 | 36.3 (25.9-55.9) | 53.8 (40.3-71.3) | 8.8 (2.2-22.5)   | 0.06 | NA | 39.4 (25.0-50.6) | 53.1 (40.6-68.4) | 8.1 (1.6-24.4)   | 0.03 | 69 |  |
| AA or AC + CC                                      | 8  | 23.8 (20.3-49.7) | 60.0 (32.8-66.3) | 20.6 (6.6-39.1)  |      |    | 27.5 (19.1-44.7) | 55.6 (46.9-68.1) | 32.5 (11.9-40.0) |      |    |  |
| <b><i>XPC c.2815A&gt;C + P53 c.215G&gt;C</i></b>   |    |                  |                  |                  |      |    |                  |                  |                  |      |    |  |
| AC or CC + GG or GC                                | 49 | 35.0 (20.0-50.6) | 58.8 (31.9-68.8) | 17.5 (5.0-22.5)  | 0.03 | 41 | 38.8 (21.9-50.6) | 55.0 (41.9-66.3) | 16.3 (5.6-25.0)  | 0.01 | 67 |  |
| AA + CC                                            | 4  | 23.1 (18.1-37.5) | 60.0 (36.3-65.9) | 29.4 (15.0-39.1) |      |    | 27.5 (20.6-47.5) | 67.5 (53.1-83.8) | 37.5 (31.3-40.0) |      |    |  |
| <b><i>XPC c.2815A&gt;C + FAS c.-1378G&gt;A</i></b> |    |                  |                  |                  |      |    |                  |                  |                  |      |    |  |
| AC or CC + GG                                      | 39 | 32.5 (20.0-52.5) | 58.8 (32.5-68.8) | 15.0 (3.8-25.0)  | 0.04 | 18 | 33.8 (18.8-52.5) | 55.0 (41.3-65.0) | 15.0 (6.3-27.5)  | 0.03 | 38 |  |
| AA + GA or AA                                      | 8  | 23.1 (17.8-31.9) | 41.9 (29.1-66.9) | 17.5 (8.1-45.0)  |      |    | 23.8 (19.4-29.7) | 48.1 (39.1-79.1) | 26.9 (12.5-49.7) |      |    |  |
| <b><i>XPC c.2815A&gt;C + FAS c.-671A&gt;G</i></b>  |    |                  |                  |                  |      |    |                  |                  |                  |      |    |  |
| AC or CC + AA                                      | 15 | 27.5 (20.0-43.8) | 48.8 (30.0-62.5) | 15.0 (5.0-25.0)  | 0.13 | NA | 25.0 (16.3-40.0) | 52.5 (30.0-57.5) | 18.8 (3.8-23.8)  | 0.03 | 55 |  |
| AA + AG or GG                                      | 19 | 26.3 (18.8-41.3) | 61.3 (46.3-72.5) | 30.0 (7.5-41.3)  |      |    | 26.3 (13.8-41.3) | 65.0 (40.0-71.3) | 35.0 (11.3-52.5) |      |    |  |
| <b><i>XPC c.2815A&gt;C + FAS c.-671A&gt;G</i></b>  |    |                  |                  |                  |      |    |                  |                  |                  |      |    |  |
| AC or CC + AA or AG                                | 41 | 27.5 (17.5-50.6) | 52.5 (30.6-66.9) | 17.5 (5.0-25.6)  | 0.06 | NA | 32.5 (18.1-48.1) | 53.8 (33.1-65.0) | 16.3 (5.6-25.0)  | 0.04 | 42 |  |

|                                             |    |                   |                  |                  |       |    |                  |                   |                  |      |    |
|---------------------------------------------|----|-------------------|------------------|------------------|-------|----|------------------|-------------------|------------------|------|----|
| AA + GG                                     | 9  | 20.0 (14.4-33.8)  | 61.3 (29.4-70.0) | 30.0 (6.3-50.0)  |       |    | 21.3 (11.9-30.0) | 65.0 (35.6-71.3)  | 38.8 (9.4-53.8)  |      |    |
| <b>XPC c.2815A&gt;C + FASL c.-844C&gt;T</b> |    |                   |                  |                  |       |    |                  |                   |                  |      |    |
| AC or CC + TT                               | 12 | 28.8 (13.8-44.7)  | 38.1 (25.0-66.6) | 13.8 (6.6-22.2)  | 0.02  | 56 | 26.3 (12.5-40.0) | 38.8 (27.5-64.4)  | 15.0 (5.3-26.6)  | 0.12 | NA |
| AA + CC or CT                               | 23 | 26.3 (15.0-50.0)  | 61.3 (56.3-72.5) | 30.0 (11.3-48.8) |       |    | 23.8 (13.8-46.3) | 57.5 (45.0-68.8)  | 27.5 (10.0-45.0) |      |    |
| <b>XPC c.2815A&gt;C + FASL c.-844C&gt;T</b> |    |                   |                  |                  |       |    |                  |                   |                  |      |    |
| AC or CC + CT or TT                         | 35 | 43.8 (17.5 -52.5) | 58.8 (31.3-68.8) | 15.0 (2.5-22.5)  | 0.003 | 76 | 40.0 (20.0-52.5) | 55.0 (46.3-68.8)  | 15.0 (5.0-27.5)  | 0.02 | 60 |
| AA + CC                                     | 8  | 22.5 (14.7-37.5)  | 56.9 (47.2-72.5) | 30.6 (17.5-50.9) |       |    | 16.3 (12.5-38.1) | 58.8 (43.8-70.0)  | 34.4 (16.6-53.4) |      |    |
| <b>XPC c.2815A&gt;C+CASP3 c.-182-247G</b>   |    |                   |                  |                  |       |    |                  |                   |                  |      |    |
| CC + CC                                     | 7  | 27.5 (21.3-52.5)  | 46.3 (26.3-70.0) | 10.0 (1.3-22.5)  | 0.04  | 31 | 38.8 (18.8-47.5) | 48.8 (35.0-67.5)  | 11.3 (5.0-23.8)  | 0.08 | NA |
| AA or AC + CA or AA                         | 51 | 32.5 (17.5-50.0)  | 61.3 (43.8-68.8) | 20.0 (11.3-30.0) |       |    | 30.0 (18.8-47.5) | 57.5 (43.8-68.8)  | 20.0 (8.8-32.5)  |      |    |
| <b>XPC c.2815A&gt;C+CASP3 c.-182-247G</b>   |    |                   |                  |                  |       |    |                  |                   |                  |      |    |
| AC or CC + CC                               | 22 | 31.3 (20.0-50.6)  | 49.4 (30.0-68.8) | 13.1 (0.6-25.3)  | 0.007 | 64 | 30.6 (20.9-48.8) | 52.5 (39.7-65.6)  | 15.0 (3.8-27.8)  | 0.07 | NA |
| AA + CA or AA                               | 23 | 26.3 (13.8-45.0)  | 61.3 (50.0-68.8) | 26.3 (11.3-48.8) |       |    | 25.0 (18.8-46.3) | 57.5 (45.0-68.8)  | 28.8 (8.8-45.0)  |      |    |
| <b>XPD c.934G&gt;A + EXO1 c.1762G&gt;A</b>  |    |                   |                  |                  |       |    |                  |                   |                  |      |    |
| GG + GG or GA                               | 42 | 34.4 (17.5-51.6)  | 61.3 (40.3-69.1) | 14.4 (4.7-29.1)  | 0.24  | NA | 33.8 (19.7-48.8) | 56.3 (42.5-66.6)  | 19.4 (8.1-28.8)  | 0.04 | 57 |
| GA or AA + AA                               | 4  | 31.3 (11.3-53.1)  | 65.6 (53.4-74.1) | 30.6 (20.0-46.9) |       |    | 30.6 (8.1-51.3)  | 68.8 (53.4-84.1)  | 39.4 (25.9-50.9) |      |    |
| <b>XPD c.934G&gt;A + CASP3 c.-182-247G</b>  |    |                   |                  |                  |       |    |                  |                   |                  |      |    |
| GG or GA + CC                               | 30 | 27.5 (20.0-46.3)  | 52.5 (29.7-67.8) | 10.6 (1.3-26.9)  | 0.04  | 41 | 28.1 (17.5-43.1) | 53.1 (37.8-65.3)  | 15.0 (4.7-29.7)  | 0.08 | NA |
| AA + CA or AA                               | 5  | 26.3 (18.8-38.8)  | 56.3 (44.4-78.1) | 21.3 (21.3-48.1) |       |    | 28.8 (17.5-43.1) | 66.3 (45.6-103.1) | 53.8 (11.3-68.8) |      |    |
| <b>XPD c.934G&gt;A + FAS c.-1378G&gt;A</b>  |    |                   |                  |                  |       |    |                  |                   |                  |      |    |
| GG or GA + GG                               | 61 | 32.5 (18.1-51.3)  | 60.0 (41.9-68.8) | 17.5 (5.0-30.0)  | 0.35  | NA | 30.0 (19.4-49.4) | 57.5 (41.9-66.9)  | 18.8 (6.3-32.5)  | 0.05 | 52 |
| AA + GA or AA                               | 4  | 31.3 (18.1-50.0)  | 56.9 (41.6-72.2) | 21.9 (21.3-28.1) |       |    | 34.4 (24.1-45.6) | 85.0 (52.5-105.3) | 45.6 (23.8-69.4) |      |    |
| <b>XPD c.934G&gt;A + FAS c.-671A&gt;G</b>   |    |                   |                  |                  |       |    |                  |                   |                  |      |    |

|                                                         |    |                  |                  |                  |      |    |                  |                   |                  |      |    |
|---------------------------------------------------------|----|------------------|------------------|------------------|------|----|------------------|-------------------|------------------|------|----|
| GG or GA + AA                                           | 27 | 27.5 (15.0-45.0) | 52.5 (30.0-63.8) | 15.0 (5.0-32.5)  | 0.06 | NA | 23.8 (18.8-40.0) | 52.5 (30.0-61.3)  | 18.8 (5.0-30.0)  | 0.05 | 90 |
| AA + AG or GG                                           | 5  | 20.0 (13.1-34.4) | 50.0 (44.4-78.1) | 30.0 (21.3-53.8) |      |    | 22.5 (8.1-34.4)  | 66.3 (48.1-103.1) | 53.8 (35.0-68.8) |      |    |
| <b><i>XPD c.934G&gt;A + FASL c.-844C&gt;T</i></b>       |    |                  |                  |                  |      |    |                  |                   |                  |      |    |
| GG or GA + TT                                           | 21 | 26.3 (15.6-42.5) | 33.8 (25.0-67.5) | 12.5 (5.0-25.6)  | 0.03 | 57 | 26.3 (17.5-36.3) | 46.3 (27.5-66.3)  | 16.3 (5.6-32.5)  | 0.11 | NA |
| AA + CC or CT                                           | 6  | 23.1 (15.3-39.4) | 53.1 (47.2-79.4) | 26.3 (21.3-47.5) |      |    | 25.6 (10.3-46.6) | 58.1 (45.9-78.1)  | 35.0 (17.5-57.8) |      |    |
| <b><i>XPD c.2251A&gt;C + EXO1 c.1762G&gt;A</i></b>      |    |                  |                  |                  |      |    |                  |                   |                  |      |    |
| AA + GG or GA                                           | 41 | 35.0 (17.5-50.6) | 60.0 (44.4-68.8) | 17.5 (6.3-26.3)  | 0.28 | NA | 33.8 (20.0-46.9) | 55.0 (40.6-65.6)  | 16.3 (10.6-27.5) | 0.03 | 62 |
| AC or CC + AA                                           | 4  | 31.3 (11.3-53.1) | 65.6 (53.4-74.1) | 30.6 (20.0-46.9) |      |    | 30.6 (8.1-51.3)  | 68.8 (53.4-84.1)  | 39.4 (25.9-50.9) |      |    |
| <b><i>XPD c.2251A&gt;C + CASP3 c.-1191A&gt;C</i></b>    |    |                  |                  |                  |      |    |                  |                   |                  |      |    |
| AA or AC + AA                                           | 32 | 33.1 (20.0-50.0) | 60.0 (35.3-66.9) | 18.8 (8.1-29.1)  | 0.29 | NA | 28.1 (20.3-48.8) | 56.3 (42.8-68.1)  | 23.1 (9.1-29.7)  | 0.05 | 55 |
| CC + AG or GG                                           | 5  | 50.0 (21.9-75.6) | 56.3 (41.3-75.6) | 5.0 (11.3-31.3)  |      |    | 52.5 (25.0-66.9) | 52.5 (47.5-69.4)  | 5.0 (3.1-25.6)   |      |    |
| <b><i>ERCC1 c.354C&gt;T + EXO1 c.1762G&gt;A</i></b>     |    |                  |                  |                  |      |    |                  |                   |                  |      |    |
| CC or CT + GG                                           | 32 | 31.3 (18.1-51.9) | 45.6 (30.0-63.1) | 11.9 (3.1-22.2)  | 0.05 | 51 | 31.3 (19.1-47.2) | 52.5 (31.3-65.0)  | 15.0 (4.1-23.8)  | 0.78 | NA |
| TT + GA or AA                                           | 12 | 39.4 (18.8-49.7) | 64.4 (49.4-67.8) | 20.6 (17.5-29.1) |      |    | 42.5 (22.2-49.7) | 58.8 (44.4-64.7)  | 18.1 (9.1-25.6)  |      |    |
| <b><i>ERCC1 c.354C&gt;T + FASL c.-844C&gt;T</i></b>     |    |                  |                  |                  |      |    |                  |                   |                  |      |    |
| CC or CT + TT                                           | 21 | 26.3 (17.5-41.9) | 38.8 (26.9-65.6) | 12.5 (6.3-25.0)  | 0.02 | 59 | 28.8 (19.4-37.5) | 46.3 (28.8-67.5)  | 16.3 (5.6-35.6)  | 0.53 | NA |
| TT + CC or CT                                           | 13 | 35.0 (16.9-49.4) | 65.0 (59.4-70.0) | 22.5 (18.1-43.8) |      |    | 40.0 (22.5-49.4) | 60.0 (55.6-69.4)  | 22.5 (10.0-30.0) |      |    |
| <b><i>ERCC1 c.354C&gt;T + FASL c.-844C&gt;T</i></b>     |    |                  |                  |                  |      |    |                  |                   |                  |      |    |
| CC or CT + CT or TT                                     | 53 | 30.0 (17.5-51.9) | 58.8 (31.9-68.1) | 15.0 (5.0-27.5)  | 0.03 | 60 | 28.8 (20.0-48.8) | 53.8 (39.4-68.8)  | 18.8 (5.0-35.6)  | 0.29 | NA |
| TT + CC                                                 | 7  | 26.3 (16.3-43.8) | 63.8 (46.3-72.5) | 26.3 (20.0-48.8) |      |    | 25.0 (18.8-40.0) | 60.0 (41.3-63.8)  | 26.3 (16.3-32.5) |      |    |
| <b><i>MLH1 c.-93G&gt;A + CASP3 c.-182-247A&gt;G</i></b> |    |                  |                  |                  |      |    |                  |                   |                  |      |    |
| GG + CC                                                 | 18 | 31.9 (19.4-52.5) | 57.5 (37.5-70.6) | 10.6 (3.1-29.1)  | 0.05 | NA | 36.9 (23.1-52.5) | 55.6 (38.8-69.4)  | 13.8 (3.8-28.8)  | 0.05 | 20 |
| GA or AA + CA or AA                                     | 22 | 28.1 (17.8-45.9) | 56.9 (44.7-61.6) | 21.3 (10.3-32.2) |      |    | 29.4 (17.2-42.5) | 54.4 (43.1-65.9)  | 20.0 (10.9-32.8) |      |    |

|                                                              |    |                  |                  |                  |       |    |                   |                   |                  |      |    |  |
|--------------------------------------------------------------|----|------------------|------------------|------------------|-------|----|-------------------|-------------------|------------------|------|----|--|
| <b><i>MSH2</i> c.211+9G&gt;C + <i>EXO1</i> c.1762G&gt;</b>   |    |                  |                  |                  |       |    |                   |                   |                  |      |    |  |
| GG + GG                                                      | 8  | 47.5 (23.8-80.9) | 54.4 (35.6-74.1) | 7.5 (6.9-16.3)   | 0.02  | 72 | 44.4 (24.7-67.5)  | 67.5 (41.6-100.6) | 10.0 (4.1-45.0)  | 0.60 | NA |  |
| GC or CC + GA or AA                                          | 40 | 36.9 (26.3-51.3) | 63.1 (53.4-70.9) | 20.0 (8.1-26.3)  |       |    | 39.4 (22.8-48.8)  | 57.5 (49.7-66.3)  | 20.0 (9.1-28.4)  |      |    |  |
| <b><i>EXO1</i> c.1762G&gt;A + <i>P53</i> c.215G&gt;C</b>     |    |                  |                  |                  |       |    |                   |                   |                  |      |    |  |
| GG + GG or GC                                                | 31 | 28.8 (17.5-45.0) | 50.0 (30.0-67.5) | 12.5 (5.0-25.0)  | 0.02  | 60 | 28.8 (18.8-47.5)  | 55.0 (31.3-68.8)  | 15.0 (3.8-36.3)  | 0.03 | 50 |  |
| GA or AA + CC                                                | 6  | 20.6 (15.0-30.0) | 60.0 (37.2-63.8) | 32.5 (22.5-41.3) |       |    | 22.5 (11.3-35.0)  | 61.9 (44.1-73.8)  | 37.5 (27.2-41.6) |      |    |  |
| <b><i>EXO1</i> c.1762G&gt;A + <i>CASP3</i> c.-182-247</b>    |    |                  |                  |                  |       |    |                   |                   |                  |      |    |  |
| GG + GG                                                      | 14 | 39.4 (20.0-52.5) | 45.6 (28.8-68.8) | 7.5 (1.3-22.5)   | 0.002 | 79 | 31.3 (19.1-48.8)  | 47.5 (29.1-63.1)  | 11.3 (1.9-23.8)  | 0.05 | NA |  |
| GA or AA + GT or TT                                          | 35 | 37.5 (18.8-51.3) | 62.5 (52.5-70.0) | 21.3 (11.3-32.5) |       |    | 38.8 (18.8-48.8)  | 57.5 (46.3-66.3)  | 20.0 (8.8-30.0)  |      |    |  |
| <b><i>EXO1</i> c.1762G&gt;A + <i>FASL</i> c.-844C&gt;T</b>   |    |                  |                  |                  |       |    |                   |                   |                  |      |    |  |
| GG + TT                                                      | 12 | 25.0 (14.7-44.7) | 30.6 (24.1-66.6) | 11.3 (3.1-19.7)  | 0.04  | 57 | 26.3 (17.2-38.1)  | 35.0 (24.7-60.3)  | 11.3 (4.1-15.9)  | 0.15 | NA |  |
| GA or AA + CC or CT                                          | 43 | 33.8 (18.8-51.3) | 61.3 (48.8-70.0) | 20.0 (10.0-33.8) |       |    | 33.8 (21.3-48.8)  | 57.5 (46.3-65.0)  | 20.0 (8.8-28.8)  |      |    |  |
| <b><i>EXO1</i> c.1762G&gt;A + <i>FASL</i> c.-844C&gt;T</b>   |    |                  |                  |                  |       |    |                   |                   |                  |      |    |  |
| GG or GA + TT                                                | 20 | 29.4 (14.7-43.4) | 35.0 (25.0-67.5) | 11.9 (5.0-23.4)  | 0.04  | 46 | 29.4 (16.9-40.0)  | 42.5 (27.5-65.9)  | 15.0 (4.1-29.7)  | 0.35 | NA |  |
| AA + CC or CT                                                | 7  | 43.8 (18.8-51.3) | 67.5 (58.8-72.5) | 21.3 (20.0-41.3) |       |    | 48.8 (21.3-55.0)  | 63.8 (53.8-87.5)  | 23.8 (8.8-23.8)  |      |    |  |
| <b><i>EXO1</i> c.1762G&gt;A + <i>FASL</i> c.-844C&gt;T</b>   |    |                  |                  |                  |       |    |                   |                   |                  |      |    |  |
| GG + CT or TT                                                | 25 | 35.0 (16.3-52.5) | 56.3 (30.0-68.1) | 12.5 (1.3-23.1)  | 0.04  | 62 | 32.5 (20.0-50.61) | 53.8 (35.0-66.9)  | 15.0 (4.4-36.9)  | 0.35 | NA |  |
| GA or AA + CC                                                | 18 | 27.5 (20.3-41.9) | 60.0 (45.6-70.0) | 21.9 (15.6-35.0) |       |    | 31.9 (13.4-42.8)  | 57.5 (43.1-64.1)  | 20.6 (11.3-28.8) |      |    |  |
| <b><i>P53</i> c.215G&gt;C + <i>CASP3</i> c.-182-247G&gt;</b> |    |                  |                  |                  |       |    |                   |                   |                  |      |    |  |
| GG + CC                                                      | 14 | 25.6 (18.4-55.9) | 51.3 (25.6-70.0) | 6.3 (1.3-25.9)   | 0.02  | 50 | 24.4 (15.6-53.4)  | 51.9 (19.7-74.7)  | 11.3 (3.4-24.7)  | 0.12 | NA |  |
| GC or CC + CA or AA                                          | 30 | 26.9 (17.5-50.6) | 58.1 (31.9-67.8) | 17.5 (11.3-27.8) |       |    | 26.9 (17.2-46.6)  | 54.4 (40.9-66.3)  | 18.8 (10.3-33.1) |      |    |  |
| <b><i>CASP3</i> c.-1191A&gt;G + <i>FASL</i> c.-844C&gt;</b>  |    |                  |                  |                  |       |    |                   |                   |                  |      |    |  |
| AA or AG + TT                                                | 19 | 26.3 (13-41.3)   | 33.8 (25.0-63.8) | 11.3 (5.0-23.8)  | 0.73  | NA | 26.3 (18.8-35.0)  | 40.0 (27.5-66.3)  | 16.3 (3.8-36.3)  | 0.94 | NA |  |

|                                             |    |                  |                  |                  |      |    |                  |                  |                  |      |    |
|---------------------------------------------|----|------------------|------------------|------------------|------|----|------------------|------------------|------------------|------|----|
| GG + CC or CT                               | 6  | 43.1 (23.4-86.6) | 69.4 (51.3-86.3) | 17.5 (8.1-42.5)  |      |    | 63.1 (21.9-82.5) | 73.1 (60.0-99.7) | 18.1 (2.5-42.5)  |      |    |
| <b>CASP3 c.-182-247G&gt;T + FAS c.-671A</b> |    |                  |                  |                  |      |    |                  |                  |                  |      |    |
| CC + AA                                     | 9  | 27.5 (17.5-40.6) | 38.8 (21.3-57.5) | 10.0 (0.0-21.9)  | 0.06 | NA | 25.0 (18.1-43.8) | 35.0 (16.9-60.0) | 3.8 (3.8-25.6)   | 0.03 | 53 |
| CA or AA + AG or GG                         | 35 | 37.5 (17.5-52.5) | 61.3 (45.0-71.3) | 18.8 (7.5-26.3)  |      |    | 40.0 (18.8-48.8) | 63.8 (46.3-73.8) | 20.0 (7.5-35.0)  |      |    |
| <b>CASP3 c.-182-247G&gt;T+FASL c.-844C</b>  |    |                  |                  |                  |      |    |                  |                  |                  |      |    |
| CC + CT or TT                               | 23 | 27.5 (18.8-45.0) | 48.8 (30.0-67.5) | 10.0 (1.3-26.3)  | 0.03 | 57 | 27.5 (20.0-40.0) | 52.5 (32.5-65.0) | 16.3 (5.0-36.3)  | 0.19 | NA |
| CA or AA + CC                               | 18 | 23.8 (17.5-38.4) | 55.0 (37.2-62.8) | 21.9 (13.8-32.2) |      |    | 25.6 (12.5-39.1) | 56.3 (40.9-64.1) | 23.1 (15.9-32.2) |      |    |

PA: power analysis; IQR: interquartile range; NA: not applied. Multiple linear regression with audiometric patterns were adjusted for cumulative cisplatin dose
